# Supplementary material for: Infectivity of Mycobacterium tuberculosis Genotypes and Outcome of Contact Investigation in Classroom in Guangxi, China
Source: Biomed Res Int. 2019 Apr 14;2019:3980658. doi: 10.1155/2019/3980658 (PMC6487147; doi:10.1155/2019/3980658)
Supplement: Supplementary Materials — (1) Supplementary materials file “Index case.xlsx” is the dataset for Table 1 of the manuscript, “Characteristics of index cases by genotypes of M.tb (N=117)”. (2) Supplementary materials file “Contact.xlsx” is the dataset for Table 2 and Figures 1, 4(a), and 4(b) of the manuscript. (3) Supplementary materials file “Genotype.xlsx” is the dataset for Figures 2 and 3 of the manuscript. [file 3980658.f1.zip]

Archive with 4 entries (3 files):
- 3980658/
- 3980658/Contact.xlsx
- 3980658/Genotype.xlsx
- 3980658/Index case.xlsx
