# Supplementary material for: Infectivity of Mycobacterium tuberculosis Genotypes and Outcome of Contact Investigation in Classroom in Guangxi, China
Source: Biomed Res Int. 2019 Apr 14;2019:3980658. doi: 10.1155/2019/3980658 (PMC6487147; doi:10.1155/2019/3980658)
Supplement: Supplementary Materials — (1) Supplementary materials file “Index case.xlsx” is the dataset for Table 1 of the manuscript, “Characteristics of index cases by genotypes of M.tb (N=117)”. (2) Supplementary materials file “Contact.xlsx” is the dataset for Table 2 and Figures 1, 4(a), and 4(b) of the manuscript. (3) Supplementary materials file “Genotype.xlsx” is the dataset for Figures 2 and 3 of the manuscript. [file 3980658.f1.zip › 3980658/Contact.xlsx]

## Sheet: Data
Index ID	Index genotype	Index sex	School type	Sex of contacts	Age of contacts	Ethnicity of contacts	BCG scar of contacts	TST of contact	New TB of contact
1	1	2	1	2	15	1	1	0	0
1	1	2	1	2	15	1	1	0	0
1	1	2	1	2	15	1	1	0	0
1	1	2	1	2	16	1	1	0	0
1	1	2	1	2	15	1	1	0	0
1	1	2	1	2	15	1	1	0	0
1	1	2	1	2	16	1	1	0	0
1	1	2	1	2	15	1	1	0	0
1	1	2	1	2	16	1	1	0	0
1	1	2	1	2	17	1	1	0	0
1	1	2	1	2	15	1	1	0	0
1	1	2	1	2	17	1	1	0	0
1	1	2	1	2	16	1	1	0	0
1	1	2	1	2	18	1	1	0	0
1	1	2	1	2	15	1	1	0	0
1	1	2	1	2	15	1	1	0	0
1	1	2	1	2	15	1	1	0	0
1	1	2	1	2	15	1	1	0	0
1	1	2	1	2	15	1	1	0	0
1	1	2	1	2	16	1	1	0	0
1	1	2	1	1	16	1	1	0	0
1	1	2	1	2	16	1	1	0	0
1	1	2	1	1	16	1	1	0	0
1	1	2	1	1	17	1	1	0	0
1	1	2	1	1	18	1	1	0	0
1	1	2	1	1	15	1	1	0	0
1	1	2	1	1	15	1	1	0	0
1	1	2	1	2	16	1	1	0	0
1	1	2	1	1	15	1	1	0	0
1	1	2	1	1	16	1	1	0	0
1	1	2	1	1	15	1	1	0	0
1	1	2	1	1	16	1	1	0	0
1	1	2	1	1	15	1	1	0	0
1	1	2	1	2	16	1	1	0	0
1	1	2	1	2	17	1	1	0	0
1	1	2	1	1	15	1	1	0	0
1	1	2	1	1	17	1	1	0	0
1	1	2	1	1	16	1	1	0	0
1	1	2	1	1	15	1	1	0	0
1	1	2	1	1	16	1	1	0	0
1	1	2	1	1	16	1	1	0	0
1	1	2	1	1	15	1	1	0	0
1	1	2	1	1	15	1	1	0	0
1	1	2	1	1	15	1	1	0	0
1	1	2	1	1	15	1	1	0	0
1	1	2	1	1	16	1	1	0	0
1	1	2	1	1	15	1	1	0	0
1	1	2	1	1	15	1	1	0	0
1	1	2	1	1	16	1	1	0	0
1	1	2	1	1	15	1	1	0	0
1	1	2	1	1	15	1	1	0	0
1	1	2	1	1	16	1	1	0	0
1	1	2	1	1	15	1	1	0	0
1	1	2	1	1	15	1	1	0	0
1	1	2	1	1	15	1	1	0	0
1	1	2	1	1	15	1	1	0	0
1	1	2	1	1	16	1	1	0	0
1	1	2	1	1	15	1	1	0	0
1	1	2	1	1	15	1	1	0	0
2	2	2	1	2	16	0	1	0	0
2	2	2	1	2	17	0	0	0	0
2	2	2	1	1	17	0	0	0	0
2	2	2	1	1	17	0	1	0	0
2	2	2	1	2	17	0	1	0	0
2	2	2	1	1	17	0	1	0	0
2	2	2	1	2	17	0	0	0	0
2	2	2	1	1	17	0	1	0	0
2	2	2	1	1	16	0	1	0	0
2	2	2	1	1	18	0	1	0	0
2	2	2	1	2	16	0	0	0	0
2	2	2	1	1	18	0	0	0	0
2	2	2	1	1	17	0	1	0	0
2	2	2	1	1	17	1	1	0	0
2	2	2	1	2	17	0	1	0	0
2	2	2	1	1	16	0	1	0	0
2	2	2	1	1	16	0	0	0	0
2	2	2	1	1	17	0	1	0	0
2	2	2	1	1	17	0	1	0	0
2	2	2	1	1	16	0	0	0	0
2	2	2	1	2	17	0	1	0	0
2	2	2	1	2	17	0	1	0	0
2	2	2	1	1	18	0	1	0	0
2	2	2	1	2	17	0	1	0	0
2	2	2	1	1	18	0	1	0	0
2	2	2	1	1	17	0	1	0	0
2	2	2	1	1	18	0	0	0	0
2	2	2	1	1	17	0	1	0	0
2	2	2	1	2	17	0	1	0	0
2	2	2	1	2	18	0	1	0	0
2	2	2	1	2	18	0	1	0	0
2	2	2	1	1	17	0	1	0	0
2	2	2	1	2	17	0	1	0	0
2	2	2	1	1	16	0	1	0	0
2	2	2	1	2	17	1	1	0	0
2	2	2	1	1	17	0	1	0	0
3	2	2	0	1	18	0	0	0	0
3	2	2	0	1	18	0	1	0	0
3	2	2	0	2	17	0	1	0	0
3	2	2	0	2	18	0	1	0	0
3	2	2	0	2	18	0	1	0	0
3	2	2	0	2	17	1	1	0	0
3	2	2	0	2	18	0	1	0	0
3	2	2	0	2	17	0	1	0	0
3	2	2	0	2	17	0	1	0	0
3	2	2	0	2	17	0	1	0	0
3	2	2	0	2	17	0	1	0	0
3	2	2	0	2	18	0	1	0	0
3	2	2	0	2	17	0	1	0	0
3	2	2	0	2	18	0	1	0	0
3	2	2	0	2	18	0	1	0	0
3	2	2	0	2	18	0	0	0	0
3	2	2	0	2	17	0	1	0	0
3	2	2	0	2	17	0	1	0	0
3	2	2	0	2	17	1	0	0	0
3	2	2	0	1	18	0	1	0	0
3	2	2	0	2	17	0	0	0	0
3	2	2	0	2	18	0	1	0	0
3	2	2	0	2	19	0	1	0	0
3	2	2	0	2	18	1	1	0	0
3	2	2	0	2	17	0	1	0	0
3	2	2	0	1	17	1	0	0	0
3	2	2	0	1	18	1	1	0	0
3	2	2	0	2	17	0	1	0	0
3	2	2	0	2	18	1	1	0	0
3	2	2	0	2	18	0	0	0	0
3	2	2	0	1	17	0	1	0	0
3	2	2	0	2	17	0	1	0	0
3	2	2	0	2	17	0	1	0	0
3	2	2	0	2	17	0	1	0	0
3	2	2	0	2	17	0	1	0	0
3	2	2	0	2	17	0	0	0	0
3	2	2	0	2	17	0	0	0	0
3	2	2	0	1	18	0	1	0	0
3	2	2	0	2	17	0	1	0	0
3	2	2	0	2	17	0	1	0	0
3	2	2	0	2	17	0	1	0	0
3	2	2	0	2	17	0	1	0	0
3	2	2	0	2	17	0	1	0	0
3	2	2	0	2	16	0	1	0	0
3	2	2	0	2	17	0	1	0	0
3	2	2	0	2	17	0	1	0	0
3	2	2	0	2	19	0	1	0	0
3	2	2	0	2	18	0	1	0	0
3	2	2	0	1	17	0	1	0	0
3	2	2	0	2	18	0	1	0	0
3	2	2	0	2	17	0	1	0	0
3	2	2	0	2	17	0	1	0	0
3	2	2	0	2	17	0	1	0	0
3	2	2	0	2	18	0	1	0	0
3	2	2	0	1	17	0	1	0	0
3	2	2	0	2	17	0	1	0	0
3	2	2	0	1	19	0	1	0	0
3	2	2	0	2	17	0	1	0	0
3	2	2	0	2	17	0	1	1	0
3	2	2	0	2	17	0	1	3	0
3	2	2	0	2	17	0	0	3	0
3	2	2	0	2	18	0	0	3	0
3	2	2	0	2	17	0	1	3	0
3	2	2	0	1	17	1	1	3	0
4	2	1	0	2	18	1	1	0	0
4	2	1	0	2	18	1	1	0	0
4	2	1	0	2	18	1	1	0	0
4	2	1	0	2	19	1	1	0	0
4	2	1	0	2	18	1	0	0	0
4	2	1	0	2	17	1	0	0	0
4	2	1	0	2	18	1	0	0	0
4	2	1	0	2	18	1	0	0	0
4	2	1	0	2	20	1	0	0	0
4	2	1	0	1	20	1	0	0	0
4	2	1	0	1	19	1	0	0	0
4	2	1	0	1	18	1	0	0	0
4	2	1	0	1	19	1	1	0	0
4	2	1	0	1	18	1	0	0	0
4	2	1	0	1	18	1	0	0	0
4	2	1	0	1	19	1	0	0	0
4	2	1	0	1	18	1	0	0	0
4	2	1	0	2	19	1	1	0	0
4	2	1	0	2	20	1	0	1	0
4	2	1	0	2	18	1	0	1	0
4	2	1	0	2	18	1	1	1	0
4	2	1	0	1	19	1	1	1	0
4	2	1	0	1	18	1	1	1	0
4	2	1	0	1	18	1	0	1	0
4	2	1	0	1	18	1	1	1	0
4	2	1	0	2	18	1	0	1	0
4	2	1	0	2	18	1	0	1	0
4	2	1	0	2	19	1	1	1	0
4	2	1	0	2	18	1	1	1	0
4	2	1	0	2	19	1	0	1	0
4	2	1	0	2	18	1	0	1	0
4	2	1	0	2	18	1	1	1	0
4	2	1	0	1	18	1	1	1	0
4	2	1	0	2	18	1	1	1	0
4	2	1	0	2	18	1	1	1	0
4	2	1	0	2	19	1	0	1	0
4	2	1	0	2	18	1	0	1	0
4	2	1	0	2	18	1	0	1	0
4	2	1	0	2	18	1	0	1	0
4	2	1	0	1	19	1	0	1	0
4	2	1	0	1	20	1	1	1	0
4	2	1	0	1	18	1	0	1	0
4	2	1	0	1	18	1	0	1	0
4	2	1	0	1	18	1	0	1	0
4	2	1	0	1	21	1	1	1	0
4	2	1	0	1	18	1	0	1	0
4	2	1	0	2	18	1	1	1	0
4	2	1	0	2	18	1	1	1	0
4	2	1	0	2	17	1	1	1	0
4	2	1	0	2	18	1	1	1	0
4	2	1	0	2	18	1	1	1	0
4	2	1	0	1	18	1	1	1	0
4	2	1	0	1	18	1	1	1	0
4	2	1	0	1	19	1	1	1	0
4	2	1	0	1	17	1	0	1	0
4	2	1	0	1	19	1	0	1	0
4	2	1	0	1	17	1	0	1	0
4	2	1	0	2	18	1	1	2	0
4	2	1	0	1	18	1	1	2	0
4	2	1	0	1	18	1	0	2	0
4	2	1	0	1	18	1	1	2	0
4	2	1	0	2	17	1	1	3	0
4	2	1	0	1	20	1	0	3	0
4	2	1	0	1	17	1	0	3	0
5	2	2	1	1	15	1	0	0	0
5	2	2	1	2	16	1	1	0	0
5	2	2	1	2	14	1	1	0	0
5	2	2	1	2	14	1	1	0	0
5	2	2	1	2	15	1	1	0	0
5	2	2	1	1	13	1	0	0	0
5	2	2	1	1	15	1	0	0	0
5	2	2	1	2	16	1	0	0	0
5	2	2	1	1	15	1	0	0	0
5	2	2	1	2	14	1	1	0	0
5	2	2	1	1	13	1	0	0	0
5	2	2	1	2	15	1	0	0	0
5	2	2	1	2	13	1	0	1	0
5	2	2	1	1	14	1	0	1	0
5	2	2	1	1	15	1	0	1	0
5	2	2	1	1	15	1	1	1	0
5	2	2	1	2	15	1	0	1	0
5	2	2	1	2	14	1	0	1	0
5	2	2	1	1	15	1	0	1	0
5	2	2	1	1	15	1	0	1	0
5	2	2	1	1	15	1	0	1	0
5	2	2	1	2	14	1	0	1	0
5	2	2	1	2	15	1	0	1	0
5	2	2	1	2	14	1	1	1	0
5	2	2	1	2	15	1	0	1	0
5	2	2	1	2	14	1	0	1	0
5	2	2	1	2	14	1	0	1	0
5	2	2	1	2	15	1	0	1	0
5	2	2	1	2	15	1	1	1	0
5	2	2	1	2	14	1	0	1	0
5	2	2	1	2	14	1	0	1	0
5	2	2	1	2	16	1	0	1	0
5	2	2	1	2	15	1	0	1	0
5	2	2	1	1	14	1	0	1	0
5	2	2	1	2	15	1	0	1	0
5	2	2	1	1	14	1	0	1	0
5	2	2	1	1	15	1	0	1	0
5	2	2	1	1	15	1	0	1	0
5	2	2	1	1	15	1	0	1	0
5	2	2	1	1	14	1	1	1	0
5	2	2	1	1	16	1	0	1	0
5	2	2	1	1	15	1	0	1	0
5	2	2	1	1	14	1	0	1	0
5	2	2	1	1	15	1	0	1	0
5	2	2	1	2	14	1	0	1	0
5	2	2	1	2	15	1	0	1	0
5	2	2	1	2	15	1	0	1	0
5	2	2	1	2	14	1	0	1	0
5	2	2	1	2	15	1	0	1	0
5	2	2	1	2	15	1	0	1	0
5	2	2	1	1	14	1	0	1	0
5	2	2	1	1	15	1	0	1	0
5	2	2	1	1	15	1	0	2	0
5	2	2	1	1	15	1	1	2	0
5	2	2	1	2	15	1	0	3	0
5	2	2	1	2	14	1	0	3	0
5	2	2	1	2	14	1	0	3	0
5	2	2	1	1	14	1	1	3	0
5	2	2	1	2	14	1	1	3	0
5	2	2	1	1	14	1	0	3	0
5	2	2	1	1	15	1	1	3	0
5	2	2	1	2	14	1	0	3	0
5	2	2	1	2	15	1	1	3	0
5	2	2	1	1	15	1	0	3	0
5	2	2	1	2	14	1	1	3	0
6	2	2	1	1	14	1	1	1	0
6	2	2	1	2	15	1	1	2	0
6	2	2	1	2	15	1	0	1	0
6	2	2	1	1	14	1	0	1	0
6	2	2	1	2	14	1	1	3	0
6	2	2	1	1	13	1	1	3	0
6	2	2	1	1	14	1	1	3	0
6	2	2	1	1	14	1	0	2	0
6	2	2	1	1	16	1	1	2	0
6	2	2	1	2	14	1	1	4	1
6	2	2	1	1	13	1	1	2	0
6	2	2	1	1	15	1	1	1	0
6	2	2	1	1	14	1	1	3	0
6	2	2	1	1	13	1	1	3	0
6	2	2	1	1	14	1	1	3	0
6	2	2	1	1	15	1	1	2	0
6	2	2	1	1	14	1	1	3	0
6	2	2	1	2	13	1	0	3	0
6	2	2	1	2	15	1	1	1	0
6	2	2	1	1	14	1	1	2	0
6	2	2	1	1	14	1	1	3	0
6	2	2	1	2	14	1	1	3	0
6	2	2	1	1	15	1	0	2	0
6	2	2	1	1	15	1	1	3	0
6	2	2	1	1	14	1	1	3	0
6	2	2	1	1	14	1	1	1	0
6	2	2	1	1	14	1	1	3	0
6	2	2	1	1	13	1	1	4	1
6	2	2	1	2	16	1	1	3	0
6	2	2	1	2	13	1	0	2	0
6	2	2	1	1	14	1	1	2	0
6	2	2	1	2	15	1	1	3	0
6	2	2	1	1	14	1	0	2	0
6	2	2	1	1	14	1	0	2	0
6	2	2	1	2	15	1	1	3	0
6	2	2	1	1	12	1	1	3	0
6	2	2	1	2	14	1	1	3	0
6	2	2	1	2	14	1	1	3	0
6	2	2	1	2	14	1	1	3	0
6	2	2	1	1	15	1	1	4	1
6	2	2	1	2	14	1	0	1	0
6	2	2	1	1	13	1	0	2	0
6	2	2	1	2	15	1	1	3	0
6	2	2	1	1	14	1	1	2	0
6	2	2	1	2	15	1	1	2	0
6	2	2	1	2	14	1	1	0	0
6	2	2	1	1	14	1	1	1	0
6	2	2	1	1	14	1	1	2	0
6	2	2	1	2	14	1	1	3	0
6	2	2	1	2	14	1	0	3	0
6	2	2	1	1	16	1	1	3	0
6	2	2	1	2	14	1	1	2	0
6	2	2	1	2	14	1	0	3	0
6	2	2	1	2	14	1	1	2	0
6	2	2	1	1	15	1	1	1	0
6	2	2	1	2	14	1	1	3	0
6	2	2	1	1	14	1	1	1	0
6	2	2	1	2	14	1	0	3	0
6	2	2	1	2	14	1	1	3	0
6	2	2	1	1	14	1	0	2	0
6	2	2	1	1	14	1	0	2	0
6	2	2	1	1	14	1	1	2	0
6	2	2	1	2	14	1	0	3	0
6	2	2	1	2	14	1	1	3	0
6	2	2	1	1	14	1	0	3	0
6	2	2	1	1	15	1	0	1	0
6	2	2	1	2	14	1	1	3	0
7	2	2	0	1	18	1	0	0	0
7	2	2	0	1	18	1	1	0	0
7	2	2	0	2	19	1	0	0	0
7	2	2	0	2	18	1	1	0	0
7	2	2	0	1	20	1	0	0	0
7	2	2	0	1	18	1	1	0	0
7	2	2	0	1	18	1	0	0	0
7	2	2	0	1	20	1	1	0	0
7	2	2	0	1	19	1	0	0	0
7	2	2	0	2	18	1	1	0	0
7	2	2	0	1	19	1	0	0	0
7	2	2	0	1	18	1	1	0	0
7	2	2	0	2	19	1	1	0	0
7	2	2	0	1	19	1	1	0	0
7	2	2	0	1	19	1	0	0	0
7	2	2	0	2	18	1	0	0	0
7	2	2	0	2	17	1	0	0	0
7	2	2	0	2	18	1	1	0	0
7	2	2	0	1	19	1	0	0	0
7	2	2	0	1	20	1	1	0	0
7	2	2	0	1	19	1	0	0	0
7	2	2	0	1	18	1	1	0	0
7	2	2	0	1	19	1	1	0	0
7	2	2	0	2	18	1	1	0	0
7	2	2	0	1	21	1	0	0	0
7	2	2	0	1	18	1	0	0	0
7	2	2	0	1	19	1	1	0	0
7	2	2	0	2	18	1	1	0	0
7	2	2	0	1	20	1	0	0	0
7	2	2	0	2	18	1	1	1	0
7	2	2	0	2	20	1	1	1	0
7	2	2	0	2	18	1	0	1	0
7	2	2	0	1	18	1	0	1	0
7	2	2	0	1	20	1	0	1	0
7	2	2	0	2	19	1	1	1	0
7	2	2	0	1	20	1	0	1	0
7	2	2	0	1	18	1	1	1	0
7	2	2	0	1	18	1	1	1	0
7	2	2	0	2	19	1	1	1	0
7	2	2	0	1	18	1	1	1	0
7	2	2	0	1	18	1	1	1	0
7	2	2	0	1	18	1	0	1	0
7	2	2	0	2	18	1	1	1	0
7	2	2	0	1	18	1	1	1	0
7	2	2	0	2	20	1	0	1	0
7	2	2	0	2	18	1	1	1	0
7	2	2	0	1	19	1	0	1	0
7	2	2	0	1	18	1	1	1	0
7	2	2	0	2	17	1	1	1	0
7	2	2	0	2	18	1	0	1	0
7	2	2	0	2	19	1	1	1	0
7	2	2	0	1	18	1	0	1	0
7	2	2	0	2	19	1	0	1	0
7	2	2	0	2	19	1	1	1	0
7	2	2	0	2	18	1	0	1	0
7	2	2	0	2	19	1	0	1	0
7	2	2	0	1	20	1	0	1	0
7	2	2	0	1	19	1	1	1	0
7	2	2	0	1	19	1	0	1	0
7	2	2	0	1	18	1	0	1	0
7	2	2	0	1	18	1	0	1	0
7	2	2	0	2	19	1	1	1	0
7	2	2	0	2	18	1	0	1	0
7	2	2	0	1	18	1	1	1	0
7	2	2	0	1	17	1	0	1	0
7	2	2	0	1	19	1	0	1	0
7	2	2	0	2	18	1	1	1	0
7	2	2	0	1	18	1	1	1	0
7	2	2	0	1	19	1	0	1	0
7	2	2	0	1	18	1	0	1	0
7	2	2	0	2	18	1	1	1	0
7	2	2	0	2	19	1	1	1	0
7	2	2	0	1	18	1	1	1	0
7	2	2	0	2	18	1	0	1	0
7	2	2	0	2	18	1	0	1	0
8	2	2	0	1	20	1	0	0	0
8	2	2	0	2	20	1	0	0	0
8	2	2	0	2	18	1	1	0	0
8	2	2	0	2	19	1	1	0	0
8	2	2	0	1	18	1	1	0	0
8	2	2	0	1	17	1	0	0	0
8	2	2	0	1	19	1	0	0	0
8	2	2	0	1	19	1	0	0	0
8	2	2	0	2	19	1	1	0	0
8	2	2	0	2	18	1	0	0	0
8	2	2	0	2	20	1	1	0	0
8	2	2	0	1	18	1	0	0	0
8	2	2	0	1	20	1	0	0	0
8	2	2	0	2	19	1	0	0	0
8	2	2	0	1	18	1	0	0	0
8	2	2	0	1	17	1	1	0	0
8	2	2	0	1	18	1	1	1	0
8	2	2	0	2	19	1	1	1	0
8	2	2	0	1	20	1	1	1	0
8	2	2	0	1	19	1	0	1	0
8	2	2	0	1	19	1	1	1	0
8	2	2	0	1	18	1	1	1	0
8	2	2	0	1	19	1	0	1	0
8	2	2	0	1	19	1	0	1	0
8	2	2	0	2	18	1	1	1	0
8	2	2	0	1	18	1	0	1	0
8	2	2	0	1	18	1	0	1	0
8	2	2	0	1	19	1	0	1	0
8	2	2	0	2	20	1	1	1	0
8	2	2	0	1	17	1	1	1	0
8	2	2	0	1	17	1	0	1	0
8	2	2	0	2	19	1	1	1	0
8	2	2	0	1	18	1	1	1	0
8	2	2	0	1	21	1	0	1	0
8	2	2	0	2	18	1	1	1	0
8	2	2	0	1	18	1	1	1	0
8	2	2	0	1	20	1	0	1	0
8	2	2	0	2	17	1	0	1	0
8	2	2	0	2	18	1	0	1	0
8	2	2	0	2	20	1	1	1	0
8	2	2	0	2	19	1	0	1	0
8	2	2	0	2	19	1	0	1	0
8	2	2	0	2	20	1	0	1	0
8	2	2	0	1	17	1	0	1	0
8	2	2	0	1	20	1	1	1	0
8	2	2	0	1	20	1	1	1	0
8	2	2	0	1	18	1	0	2	0
8	2	2	0	1	18	1	1	3	0
8	2	2	0	2	19	1	0	3	0
8	2	2	0	1	19	1	0	3	0
8	2	2	0	2	18	1	0	3	0
8	2	2	0	2	18	1	0	4	1
9	2	1	0	1	19	1	0	0	0
9	2	1	0	1	19	1	1	0	0
9	2	1	0	1	18	1	1	0	0
9	2	1	0	1	19	1	0	0	0
9	2	1	0	1	19	1	0	0	0
9	2	1	0	1	18	1	1	0	0
9	2	1	0	1	19	1	1	0	0
9	2	1	0	2	18	1	0	0	0
9	2	1	0	2	20	1	0	0	0
9	2	1	0	2	18	1	0	0	0
9	2	1	0	2	17	1	1	0	0
9	2	1	0	2	19	1	1	0	0
9	2	1	0	1	19	1	0	0	0
9	2	1	0	2	18	1	0	0	0
9	2	1	0	2	21	1	0	0	0
9	2	1	0	2	18	1	1	0	0
9	2	1	0	2	18	1	0	0	0
9	2	1	0	2	18	1	1	0	0
9	2	1	0	2	18	1	1	0	0
9	2	1	0	2	18	1	0	0	0
9	2	1	0	2	18	1	1	0	0
9	2	1	0	1	17	1	0	1	0
9	2	1	0	1	17	1	1	1	0
9	2	1	0	1	19	1	0	1	0
9	2	1	0	1	18	1	1	1	0
9	2	1	0	1	18	1	1	1	0
9	2	1	0	1	18	1	1	1	0
9	2	1	0	2	19	1	1	1	0
9	2	1	0	2	18	1	0	1	0
9	2	1	0	2	18	1	0	1	0
9	2	1	0	2	20	1	0	1	0
9	2	1	0	2	19	1	0	1	0
9	2	1	0	2	18	1	1	1	0
9	2	1	0	2	18	1	0	1	0
9	2	1	0	2	19	1	1	1	0
9	2	1	0	2	18	1	1	1	0
9	2	1	0	1	18	1	0	1	0
9	2	1	0	1	18	1	1	1	0
9	2	1	0	1	18	1	1	1	0
9	2	1	0	2	17	1	1	1	0
9	2	1	0	1	19	1	1	1	0
9	2	1	0	1	18	1	0	1	0
9	2	1	0	1	18	1	1	1	0
9	2	1	0	1	18	1	1	1	0
9	2	1	0	1	18	1	0	1	0
9	2	1	0	1	19	1	0	1	0
9	2	1	0	1	18	1	0	1	0
9	2	1	0	1	18	1	0	1	0
9	2	1	0	1	18	1	1	1	0
9	2	1	0	2	20	1	0	1	0
9	2	1	0	2	19	1	1	1	0
9	2	1	0	1	19	1	1	1	0
9	2	1	0	1	18	1	1	1	0
9	2	1	0	1	19	1	1	1	0
9	2	1	0	1	18	1	1	1	0
9	2	1	0	1	18	1	1	1	0
9	2	1	0	1	20	1	0	1	0
9	2	1	0	1	18	1	1	1	0
9	2	1	0	1	18	1	1	1	0
9	2	1	0	2	19	1	1	1	0
9	2	1	0	2	18	1	1	3	0
9	2	1	0	1	18	1	1	3	0
9	2	1	0	2	20	1	0	3	0
10	1	2	1	1	14	1	0	0	0
10	1	2	1	1	13	1	1	0	0
10	1	2	1	2	15	1	0	0	0
10	1	2	1	1	13	1	0	0	0
10	1	2	1	1	13	1	0	0	0
10	1	2	1	1	13	1	0	0	0
10	1	2	1	2	15	1	1	0	0
10	1	2	1	2	14	1	0	0	0
10	1	2	1	2	14	1	1	0	0
10	1	2	1	1	14	1	0	0	0
10	1	2	1	2	14	1	0	0	0
10	1	2	1	1	14	1	0	0	0
10	1	2	1	1	14	1	1	0	0
10	1	2	1	1	13	1	0	0	0
10	1	2	1	2	14	1	0	0	0
10	1	2	1	2	15	1	0	0	0
10	1	2	1	1	14	1	0	0	0
10	1	2	1	1	13	1	1	0	0
10	1	2	1	2	15	1	0	0	0
10	1	2	1	2	14	1	0	0	0
10	1	2	1	1	15	1	0	0	0
10	1	2	1	2	15	1	0	0	0
10	1	2	1	2	14	1	0	0	0
10	1	2	1	2	14	1	0	0	0
10	1	2	1	2	14	1	0	0	0
10	1	2	1	1	14	1	0	0	0
10	1	2	1	1	14	1	0	1	0
10	1	2	1	1	14	1	0	1	0
10	1	2	1	1	15	1	0	1	0
10	1	2	1	2	15	1	1	1	0
10	1	2	1	2	14	1	0	1	0
10	1	2	1	1	13	1	1	1	0
10	1	2	1	2	15	1	0	1	0
10	1	2	1	2	13	1	0	1	0
10	1	2	1	1	15	1	0	1	0
10	1	2	1	2	14	1	0	1	0
10	1	2	1	1	13	1	0	1	0
10	1	2	1	1	13	1	0	1	0
10	1	2	1	2	13	1	1	1	0
10	1	2	1	2	15	1	0	1	0
10	1	2	1	2	13	1	0	1	0
10	1	2	1	1	14	1	1	1	0
10	1	2	1	1	16	1	0	1	0
10	1	2	1	1	13	1	0	1	0
10	1	2	1	2	15	1	1	1	0
10	1	2	1	2	15	1	0	1	0
10	1	2	1	2	13	1	0	1	0
10	1	2	1	2	14	1	0	1	0
10	1	2	1	1	14	1	0	1	0
10	1	2	1	2	14	1	1	1	0
10	1	2	1	1	13	1	1	1	0
10	1	2	1	2	14	1	0	1	0
10	1	2	1	2	14	1	0	1	0
10	1	2	1	2	14	1	0	1	0
10	1	2	1	2	13	1	0	1	0
10	1	2	1	2	13	1	0	1	0
10	1	2	1	1	15	1	0	1	0
10	1	2	1	2	14	1	0	1	0
10	1	2	1	2	14	1	0	1	0
10	1	2	1	1	14	1	0	1	0
10	1	2	1	2	13	1	0	1	0
10	1	2	1	1	14	1	0	1	0
10	1	2	1	1	14	1	0	1	0
10	1	2	1	1	13	1	0	1	0
10	1	2	1	2	14	1	0	1	0
10	1	2	1	2	13	1	0	1	0
10	1	2	1	1	13	1	0	1	0
10	1	2	1	2	15	1	0	1	0
10	1	2	1	2	13	1	1	1	0
10	1	2	1	1	13	1	0	1	0
10	1	2	1	1	15	1	0	1	0
10	1	2	1	2	15	1	0	1	0
10	1	2	1	1	13	1	0	1	0
10	1	2	1	1	15	1	0	1	0
10	1	2	1	1	14	1	0	1	0
10	1	2	1	1	14	1	0	1	0
10	1	2	1	2	13	1	0	1	0
10	1	2	1	2	13	1	0	2	0
11	2	1	0	1	19	1	0	0	0
11	2	1	0	1	20	1	1	0	0
11	2	1	0	2	19	1	0	0	0
11	2	1	0	1	20	1	0	0	0
11	2	1	0	1	19	1	0	0	0
11	2	1	0	2	17	1	1	0	0
11	2	1	0	2	19	1	1	0	0
11	2	1	0	2	18	1	0	0	0
11	2	1	0	2	17	1	1	0	0
11	2	1	0	1	18	1	1	0	0
11	2	1	0	1	19	1	1	0	0
11	2	1	0	2	18	1	0	0	0
11	2	1	0	1	18	1	0	0	0
11	2	1	0	2	19	1	0	0	0
11	2	1	0	2	18	1	1	0	0
11	2	1	0	2	18	1	1	0	0
11	2	1	0	1	19	1	0	0	0
11	2	1	0	1	19	1	1	0	0
11	2	1	0	1	19	1	0	1	0
11	2	1	0	1	19	1	0	1	0
11	2	1	0	1	17	1	1	1	0
11	2	1	0	1	18	1	1	1	0
11	2	1	0	1	17	1	0	1	0
11	2	1	0	1	18	1	1	1	0
11	2	1	0	1	20	1	0	1	0
11	2	1	0	1	18	1	1	1	0
11	2	1	0	2	18	1	0	1	0
11	2	1	0	2	18	1	0	1	0
11	2	1	0	2	18	1	1	1	0
11	2	1	0	2	18	1	0	1	0
11	2	1	0	1	19	1	0	1	0
11	2	1	0	2	18	1	0	1	0
11	2	1	0	2	18	1	0	1	0
11	2	1	0	1	19	1	0	1	0
11	2	1	0	2	18	1	0	1	0
11	2	1	0	2	19	1	0	1	0
11	2	1	0	2	19	1	0	1	0
11	2	1	0	2	19	1	1	1	0
11	2	1	0	2	18	1	1	1	0
11	2	1	0	2	18	1	1	1	0
11	2	1	0	2	18	1	1	1	0
11	2	1	0	1	18	1	1	1	0
11	2	1	0	1	18	1	1	1	0
11	2	1	0	1	18	1	1	1	0
11	2	1	0	2	19	1	0	1	0
11	2	1	0	2	18	1	1	1	0
11	2	1	0	2	20	1	0	1	0
11	2	1	0	2	18	1	0	1	0
11	2	1	0	2	18	1	0	1	0
11	2	1	0	2	18	1	1	1	0
11	2	1	0	2	19	1	0	1	0
11	2	1	0	2	19	1	0	1	0
11	2	1	0	2	19	1	1	1	0
11	2	1	0	2	18	1	1	1	0
11	2	1	0	1	18	1	0	1	0
11	2	1	0	2	19	1	1	1	0
11	2	1	0	2	19	1	0	1	0
11	2	1	0	2	19	1	0	1	0
11	2	1	0	2	18	1	0	1	0
11	2	1	0	2	19	1	0	1	0
11	2	1	0	2	18	1	0	1	0
11	2	1	0	2	17	1	0	3	0
12	2	2	1	2	16	1	1	0	0
12	2	2	1	2	15	1	1	0	0
12	2	2	1	2	16	1	1	0	0
12	2	2	1	2	17	1	0	0	0
12	2	2	1	2	16	1	1	0	0
12	2	2	1	2	16	1	1	0	0
12	2	2	1	2	16	1	1	0	0
12	2	2	1	2	16	1	1	0	0
12	2	2	1	2	16	1	0	0	0
12	2	2	1	2	16	1	1	0	0
12	2	2	1	2	17	1	1	0	0
12	2	2	1	1	16	1	1	0	0
12	2	2	1	1	14	1	1	0	0
12	2	2	1	1	16	1	1	0	0
12	2	2	1	2	17	1	0	1	0
12	2	2	1	2	15	1	0	1	0
12	2	2	1	2	15	1	1	1	0
12	2	2	1	2	17	1	1	1	0
12	2	2	1	2	15	1	0	1	0
12	2	2	1	2	15	1	0	1	0
12	2	2	1	1	16	1	1	1	0
12	2	2	1	1	16	1	1	1	0
12	2	2	1	1	16	1	1	1	0
12	2	2	1	1	15	1	1	1	0
12	2	2	1	1	15	1	1	1	0
12	2	2	1	1	16	1	1	1	0
12	2	2	1	1	16	1	1	1	0
12	2	2	1	2	16	1	0	1	0
12	2	2	1	2	16	1	1	1	0
12	2	2	1	2	16	1	0	1	0
12	2	2	1	2	15	1	0	1	0
12	2	2	1	1	17	1	1	1	0
12	2	2	1	1	16	1	1	1	0
12	2	2	1	1	15	1	0	1	0
12	2	2	1	2	16	1	0	1	0
12	2	2	1	2	15	1	0	1	0
12	2	2	1	2	16	1	0	1	0
12	2	2	1	2	17	1	0	1	0
12	2	2	1	2	15	1	0	1	0
12	2	2	1	2	15	1	1	1	0
12	2	2	1	2	16	1	1	1	0
12	2	2	1	2	15	1	0	1	0
12	2	2	1	2	15	1	1	1	0
12	2	2	1	1	15	1	0	1	0
12	2	2	1	1	17	1	0	1	0
12	2	2	1	1	16	1	1	1	0
12	2	2	1	1	16	1	1	1	0
12	2	2	1	1	16	1	0	1	0
12	2	2	1	2	17	1	0	1	0
12	2	2	1	2	17	1	1	1	0
12	2	2	1	2	16	1	0	1	0
12	2	2	1	2	15	1	0	1	0
12	2	2	1	2	17	1	1	1	0
12	2	2	1	2	16	1	0	1	0
12	2	2	1	1	17	1	1	1	0
12	2	2	1	1	16	1	0	1	0
12	2	2	1	1	14	1	0	1	0
12	2	2	1	1	16	1	0	1	0
12	2	2	1	1	16	1	1	1	0
12	2	2	1	1	16	1	1	1	0
12	2	2	1	1	16	1	0	1	0
12	2	2	1	1	17	1	0	1	0
12	2	2	1	1	16	1	0	1	0
12	2	2	1	2	15	1	0	2	0
12	2	2	1	2	16	1	1	2	0
12	2	2	1	2	17	1	1	2	0
12	2	2	1	2	16	1	1	2	0
12	2	2	1	2	15	1	0	2	0
12	2	2	1	2	14	1	0	2	0
12	2	2	1	1	16	1	0	2	0
12	2	2	1	1	16	1	0	2	0
12	2	2	1	1	15	1	0	2	0
12	2	2	1	1	17	1	0	2	0
12	2	2	1	1	15	1	0	2	0
12	2	2	1	1	17	1	0	2	0
12	2	2	1	2	16	1	1	2	0
12	2	2	1	1	15	1	0	2	0
12	2	2	1	1	16	1	0	2	0
13	2	1	0	2	16	1	0	0	0
13	2	1	0	1	17	1	1	0	0
13	2	1	0	2	17	1	0	0	0
13	2	1	0	1	17	1	1	0	0
13	2	1	0	2	16	1	1	0	0
13	2	1	0	2	17	1	1	0	0
13	2	1	0	1	16	1	1	0	0
13	2	1	0	2	16	1	0	0	0
13	2	1	0	2	17	1	1	0	0
13	2	1	0	2	19	1	1	0	0
13	2	1	0	2	17	0	0	0	0
13	2	1	0	2	16	1	1	0	0
13	2	1	0	2	16	1	1	0	0
13	2	1	0	2	18	1	1	0	0
13	2	1	0	2	16	1	1	0	0
13	2	1	0	2	16	1	0	0	0
13	2	1	0	1	16	1	1	0	0
13	2	1	0	2	17	1	1	0	0
13	2	1	0	2	16	1	1	0	0
13	2	1	0	2	16	0	1	0	0
13	2	1	0	2	15	1	1	0	0
13	2	1	0	2	16	1	1	0	0
13	2	1	0	2	15	1	1	0	0
13	2	1	0	2	17	1	0	0	0
13	2	1	0	2	16	1	0	0	0
13	2	1	0	2	16	1	1	0	0
13	2	1	0	2	16	1	1	0	0
13	2	1	0	1	17	1	0	0	0
13	2	1	0	1	17	1	0	0	0
13	2	1	0	1	16	1	1	0	0
13	2	1	0	2	16	1	0	0	0
13	2	1	0	1	16	1	0	0	0
13	2	1	0	1	17	1	1	0	0
13	2	1	0	2	18	1	1	0	0
13	2	1	0	1	16	1	1	0	0
13	2	1	0	1	17	1	1	0	0
13	2	1	0	2	16	1	1	0	0
13	2	1	0	2	16	0	1	0	0
13	2	1	0	2	17	1	1	0	0
13	2	1	0	2	16	1	1	0	0
13	2	1	0	1	17	1	1	0	0
13	2	1	0	2	16	1	1	0	0
13	2	1	0	2	15	1	1	0	0
13	2	1	0	2	16	1	1	0	0
13	2	1	0	2	17	1	1	0	0
13	2	1	0	2	17	1	1	0	0
13	2	1	0	1	16	1	1	0	0
13	2	1	0	1	16	1	1	0	0
13	2	1	0	2	15	1	1	0	0
13	2	1	0	1	17	1	1	0	0
13	2	1	0	2	16	1	1	0	0
13	2	1	0	2	17	1	1	0	0
13	2	1	0	2	17	1	1	0	0
13	2	1	0	2	16	1	1	0	0
13	2	1	0	2	17	1	1	0	0
13	2	1	0	2	15	1	1	0	0
13	2	1	0	2	16	1	1	0	0
13	2	1	0	1	16	1	1	0	0
13	2	1	0	2	16	1	1	0	0
13	2	1	0	1	16	1	1	0	0
13	2	1	0	2	17	1	1	0	0
13	2	1	0	2	16	1	1	0	0
13	2	1	0	1	17	1	1	0	0
13	2	1	0	1	17	1	1	0	0
13	2	1	0	2	15	1	1	0	0
13	2	1	0	2	17	1	1	0	0
13	2	1	0	2	16	1	1	3	0
13	2	1	0	2	15	1	1	3	0
13	2	1	0	2	17	1	1	3	0
13	2	1	0	2	17	1	1	3	0
14	2	2	1	2	15	1	1	0	0
14	2	2	1	2	14	1	1	0	0
14	2	2	1	2	15	1	0	0	0
14	2	2	1	2	14	1	1	0	0
14	2	2	1	2	15	1	1	0	0
14	2	2	1	2	14	1	1	0	0
14	2	2	1	2	15	1	0	0	0
14	2	2	1	2	15	1	0	0	0
14	2	2	1	2	14	1	1	0	0
14	2	2	1	2	14	1	1	0	0
14	2	2	1	2	15	1	1	0	0
14	2	2	1	2	16	1	1	0	0
14	2	2	1	2	15	1	1	0	0
14	2	2	1	2	15	1	0	0	0
14	2	2	1	2	14	1	0	0	0
14	2	2	1	2	14	1	0	0	0
14	2	2	1	2	13	1	1	0	0
14	2	2	1	2	16	1	0	0	0
14	2	2	1	2	14	1	1	0	0
14	2	2	1	2	16	1	0	0	0
14	2	2	1	2	14	1	1	0	0
14	2	2	1	2	14	1	0	0	0
14	2	2	1	2	14	1	0	0	0
14	2	2	1	2	14	1	1	0	0
14	2	2	1	2	14	1	1	0	0
14	2	2	1	2	15	1	1	0	0
14	2	2	1	2	15	1	1	0	0
14	2	2	1	2	15	1	1	0	0
14	2	2	1	1	15	1	1	0	0
14	2	2	1	1	15	1	1	0	0
14	2	2	1	1	15	1	0	0	0
14	2	2	1	1	15	1	1	0	0
14	2	2	1	1	15	1	1	0	0
14	2	2	1	1	16	1	0	0	0
14	2	2	1	1	16	1	0	0	0
14	2	2	1	1	15	1	1	0	0
14	2	2	1	1	15	0	1	0	0
14	2	2	1	1	14	1	1	0	0
14	2	2	1	1	14	1	1	0	0
14	2	2	1	1	14	1	1	0	0
14	2	2	1	1	14	1	0	0	0
14	2	2	1	1	15	1	1	0	0
14	2	2	1	1	14	1	1	0	0
14	2	2	1	1	15	1	1	0	0
14	2	2	1	1	15	1	1	0	0
14	2	2	1	1	14	1	1	0	0
14	2	2	1	1	15	1	0	0	0
14	2	2	1	1	14	1	0	0	0
14	2	2	1	1	15	1	1	0	0
14	2	2	1	1	14	1	0	0	0
14	2	2	1	1	15	1	1	0	0
14	2	2	1	1	15	1	1	0	0
14	2	2	1	1	15	1	1	0	0
14	2	2	1	1	15	1	1	0	0
14	2	2	1	1	15	1	1	0	0
14	2	2	1	1	14	1	1	0	0
14	2	2	1	1	15	1	1	0	0
15	2	1	1	1	14	1	1	0	0
15	2	1	1	1	13	1	0	0	0
15	2	1	1	1	13	1	1	0	0
15	2	1	1	1	14	1	1	0	0
15	2	1	1	1	13	1	1	0	0
15	2	1	1	1	12	1	1	0	0
15	2	1	1	1	13	1	0	0	0
15	2	1	1	1	14	1	0	0	0
15	2	1	1	1	14	1	1	0	0
15	2	1	1	1	14	1	0	0	0
15	2	1	1	1	13	1	0	0	0
15	2	1	1	1	14	1	0	0	0
15	2	1	1	1	14	1	1	0	0
15	2	1	1	1	13	1	1	0	0
15	2	1	1	1	13	1	0	0	0
15	2	1	1	1	14	1	0	0	0
15	2	1	1	1	13	1	1	0	0
15	2	1	1	1	14	1	0	0	0
15	2	1	1	1	14	1	1	0	0
15	2	1	1	1	14	1	0	0	0
15	2	1	1	2	13	0	1	0	0
15	2	1	1	2	13	1	1	0	0
15	2	1	1	2	13	1	1	0	0
15	2	1	1	2	14	1	0	0	0
15	2	1	1	1	14	1	0	0	0
15	2	1	1	2	13	1	0	0	0
15	2	1	1	2	13	1	1	0	0
15	2	1	1	2	13	1	1	0	0
15	2	1	1	2	14	1	0	0	0
15	2	1	1	2	14	1	0	0	0
15	2	1	1	2	14	1	1	0	0
15	2	1	1	2	14	1	1	0	0
15	2	1	1	2	13	1	1	0	0
15	2	1	1	2	13	1	1	0	0
15	2	1	1	2	12	1	1	0	0
15	2	1	1	2	13	1	0	0	0
15	2	1	1	2	13	1	1	0	0
15	2	1	1	2	15	1	0	0	0
15	2	1	1	2	13	1	1	0	0
15	2	1	1	2	13	1	1	0	0
15	2	1	1	2	15	1	0	0	0
15	2	1	1	2	14	1	1	0	0
15	2	1	1	2	12	1	1	0	0
15	2	1	1	2	14	1	0	0	0
15	2	1	1	2	13	1	1	0	0
15	2	1	1	2	13	1	1	0	0
16	2	2	0	2	18	1	0	0	0
16	2	2	0	1	17	0	1	0	0
16	2	2	0	1	17	1	0	0	0
16	2	2	0	2	18	1	1	0	0
16	2	2	0	1	17	1	1	0	0
16	2	2	0	1	18	1	1	0	0
16	2	2	0	1	17	1	1	0	0
16	2	2	0	2	19	1	0	0	0
16	2	2	0	2	17	1	1	0	0
16	2	2	0	2	17	1	1	0	0
16	2	2	0	2	17	1	1	0	0
16	2	2	0	2	18	1	1	0	0
16	2	2	0	2	17	1	1	0	0
16	2	2	0	1	18	1	1	0	0
16	2	2	0	1	18	1	1	0	0
16	2	2	0	1	17	0	1	0	0
16	2	2	0	2	18	1	0	0	0
16	2	2	0	2	18	1	0	0	0
16	2	2	0	1	17	1	1	0	0
16	2	2	0	1	17	1	0	0	0
16	2	2	0	2	18	1	0	0	0
16	2	2	0	2	17	1	1	0	0
16	2	2	0	2	17	1	1	0	0
16	2	2	0	1	18	1	1	0	0
16	2	2	0	2	18	1	0	0	0
16	2	2	0	2	17	1	1	0	0
16	2	2	0	2	17	1	1	0	0
16	2	2	0	1	17	1	1	1	0
16	2	2	0	1	17	1	1	1	0
16	2	2	0	2	18	1	0	1	0
16	2	2	0	2	18	1	1	1	0
16	2	2	0	2	18	1	1	1	0
16	2	2	0	1	17	1	1	1	0
16	2	2	0	1	17	1	1	1	0
16	2	2	0	2	16	1	1	1	0
16	2	2	0	2	18	1	1	1	0
16	2	2	0	1	18	1	0	1	0
16	2	2	0	2	18	1	1	1	0
16	2	2	0	2	18	1	0	1	0
16	2	2	0	1	19	1	0	1	0
16	2	2	0	2	21	1	0	1	0
16	2	2	0	1	19	1	1	2	0
16	2	2	0	2	18	1	0	2	0
16	2	2	0	1	18	1	1	2	0
16	2	2	0	1	18	1	1	2	0
16	2	2	0	2	18	1	1	2	0
16	2	2	0	1	20	1	0	2	0
16	2	2	0	1	19	1	1	2	0
16	2	2	0	1	17	1	1	2	0
16	2	2	0	1	17	1	1	2	0
16	2	2	0	2	16	1	1	3	0
16	2	2	0	1	18	1	0	3	0
16	2	2	0	2	18	1	1	3	0
17	2	1	0	1	19	1	0	0	0
17	2	1	0	1	19	1	1	0	0
17	2	1	0	2	20	1	1	0	0
17	2	1	0	1	19	1	0	0	0
17	2	1	0	2	19	1	0	0	0
17	2	1	0	2	18	1	0	0	0
17	2	1	0	2	18	1	1	0	0
17	2	1	0	2	18	1	0	0	0
17	2	1	0	2	19	1	1	0	0
17	2	1	0	2	19	1	1	0	0
17	2	1	0	2	20	1	0	0	0
17	2	1	0	2	20	1	0	0	0
17	2	1	0	2	20	1	1	0	0
17	2	1	0	1	19	1	0	0	0
17	2	1	0	2	18	1	1	0	0
17	2	1	0	2	18	1	0	0	0
17	2	1	0	2	18	1	1	0	0
17	2	1	0	2	20	1	1	0	0
17	2	1	0	1	18	1	0	0	0
17	2	1	0	2	19	1	1	0	0
17	2	1	0	2	18	1	1	0	0
17	2	1	0	2	19	1	1	0	0
17	2	1	0	2	17	1	1	0	0
17	2	1	0	2	18	1	1	0	0
17	2	1	0	2	18	1	1	0	0
17	2	1	0	1	19	1	0	0	0
17	2	1	0	2	18	1	1	0	0
17	2	1	0	2	20	1	0	0	0
17	2	1	0	2	19	1	0	0	0
17	2	1	0	2	19	1	1	0	0
17	2	1	0	1	18	1	1	0	0
17	2	1	0	2	19	1	1	0	0
17	2	1	0	1	18	1	0	0	0
17	2	1	0	1	18	1	1	0	0
17	2	1	0	1	19	1	1	0	0
17	2	1	0	1	18	1	1	1	0
17	2	1	0	1	18	1	1	1	0
17	2	1	0	2	19	1	1	1	0
17	2	1	0	2	20	1	1	1	0
17	2	1	0	1	18	1	1	1	0
17	2	1	0	2	18	1	1	1	0
17	2	1	0	1	20	1	1	2	0
17	2	1	0	2	19	1	1	3	0
17	2	1	0	1	19	1	1	3	0
17	2	1	0	1	18	1	1	3	0
17	2	1	0	2	18	1	1	3	0
18	2	1	1	1	15	0	1	0	0
18	2	1	1	1	15	0	0	0	0
18	2	1	1	1	15	0	1	0	0
18	2	1	1	1	16	0	1	0	0
18	2	1	1	1	15	0	1	0	0
18	2	1	1	1	15	0	1	0	0
18	2	1	1	1	15	0	1	0	0
18	2	1	1	1	15	0	1	0	0
18	2	1	1	1	15	1	1	0	0
18	2	1	1	1	15	1	1	0	0
18	2	1	1	1	15	0	1	0	0
18	2	1	1	1	16	1	0	0	0
18	2	1	1	1	15	0	1	0	0
18	2	1	1	1	15	0	1	0	0
18	2	1	1	2	14	0	0	0	0
18	2	1	1	2	14	0	1	0	0
18	2	1	1	2	14	1	1	0	0
18	2	1	1	2	15	0	1	0	0
18	2	1	1	2	15	1	1	0	0
18	2	1	1	2	14	0	1	0	0
18	2	1	1	2	15	0	0	0	0
18	2	1	1	2	14	1	1	0	0
18	2	1	1	2	15	0	0	0	0
18	2	1	1	2	15	0	1	0	0
18	2	1	1	2	15	0	1	0	0
18	2	1	1	1	14	0	1	0	0
18	2	1	1	1	15	0	1	0	0
18	2	1	1	1	14	0	1	0	0
18	2	1	1	1	13	0	1	0	0
18	2	1	1	1	15	0	1	0	0
18	2	1	1	1	14	0	1	0	0
18	2	1	1	2	14	1	0	0	0
18	2	1	1	1	14	0	0	0	0
18	2	1	1	2	15	1	0	0	0
18	2	1	1	2	15	0	1	0	0
18	2	1	1	1	15	0	1	0	0
18	2	1	1	2	15	0	1	0	0
18	2	1	1	2	14	0	1	0	0
18	2	1	1	2	13	0	0	0	0
18	2	1	1	2	14	0	0	0	0
18	2	1	1	2	15	0	0	0	0
18	2	1	1	2	16	1	1	0	0
18	2	1	1	2	15	1	1	0	0
18	2	1	1	2	14	0	0	0	0
18	2	1	1	1	15	0	1	1	0
18	2	1	1	2	14	0	1	1	0
18	2	1	1	1	14	0	0	1	0
18	2	1	1	1	15	0	1	1	0
18	2	1	1	1	15	1	0	1	0
18	2	1	1	1	15	0	1	1	0
18	2	1	1	1	15	1	1	2	0
19	2	1	1	1	14	1	0	0	0
19	2	1	1	2	15	1	1	0	0
19	2	1	1	2	14	0	0	0	0
19	2	1	1	2	14	1	1	0	0
19	2	1	1	1	14	1	1	0	0
19	2	1	1	1	14	0	1	0	0
19	2	1	1	1	14	0	1	0	0
19	2	1	1	2	14	1	1	0	0
19	2	1	1	1	14	0	1	0	0
19	2	1	1	2	14	0	1	0	0
19	2	1	1	2	16	1	1	0	0
19	2	1	1	2	14	1	1	0	0
19	2	1	1	1	14	1	1	0	0
19	2	1	1	1	16	1	1	0	0
19	2	1	1	1	14	1	1	0	0
19	2	1	1	2	15	1	1	0	0
19	2	1	1	1	17	1	1	0	0
19	2	1	1	2	14	1	0	0	0
19	2	1	1	1	15	0	0	0	0
19	2	1	1	2	15	1	1	0	0
19	2	1	1	1	15	1	1	0	0
19	2	1	1	1	15	1	1	0	0
19	2	1	1	2	14	1	0	0	0
19	2	1	1	1	14	1	1	0	0
19	2	1	1	2	15	1	1	0	0
19	2	1	1	1	14	1	0	0	0
19	2	1	1	1	14	1	1	0	0
19	2	1	1	1	14	1	1	0	0
19	2	1	1	1	16	1	1	0	0
19	2	1	1	1	15	1	1	0	0
19	2	1	1	2	15	0	1	0	0
19	2	1	1	1	15	0	1	0	0
19	2	1	1	1	15	1	1	0	0
19	2	1	1	2	14	1	1	0	0
19	2	1	1	1	14	0	1	0	0
19	2	1	1	2	14	1	1	0	0
19	2	1	1	2	13	1	1	0	0
19	2	1	1	1	14	1	1	0	0
19	2	1	1	1	15	1	1	0	0
19	2	1	1	2	15	1	1	0	0
19	2	1	1	1	14	1	1	0	0
19	2	1	1	1	15	1	1	0	0
19	2	1	1	2	14	0	1	0	0
19	2	1	1	1	13	1	1	1	0
19	2	1	1	1	14	0	1	1	0
19	2	1	1	1	15	0	1	1	0
19	2	1	1	2	15	1	1	1	0
19	2	1	1	2	14	1	0	1	0
19	2	1	1	2	15	1	0	1	0
19	2	1	1	2	14	1	1	1	0
19	2	1	1	1	15	1	1	1	0
19	2	1	1	2	16	1	0	1	0
19	2	1	1	2	15	1	1	1	0
19	2	1	1	1	14	1	1	2	0
20	2	2	0	2	16	1	1	0	0
20	2	2	0	1	16	1	1	0	0
20	2	2	0	1	16	0	1	0	0
20	2	2	0	2	16	1	1	0	0
20	2	2	0	2	16	1	1	0	0
20	2	2	0	2	16	1	1	0	0
20	2	2	0	1	18	1	1	0	0
20	2	2	0	2	17	1	1	0	0
20	2	2	0	1	16	1	0	0	0
20	2	2	0	1	16	0	1	0	0
20	2	2	0	1	16	1	1	0	0
20	2	2	0	1	17	1	1	0	0
20	2	2	0	2	15	1	1	0	0
20	2	2	0	2	16	1	1	0	0
20	2	2	0	2	16	1	1	0	0
20	2	2	0	1	16	1	1	0	0
20	2	2	0	2	16	1	1	0	0
20	2	2	0	2	16	1	1	0	0
20	2	2	0	1	16	1	1	0	0
20	2	2	0	1	16	1	0	0	0
20	2	2	0	1	16	1	0	0	0
20	2	2	0	2	16	1	1	0	0
20	2	2	0	1	16	1	1	0	0
20	2	2	0	1	15	1	0	0	0
20	2	2	0	1	16	1	0	0	0
20	2	2	0	2	17	1	1	0	0
20	2	2	0	1	17	1	1	0	0
20	2	2	0	2	17	0	1	0	0
20	2	2	0	1	16	1	1	0	0
20	2	2	0	1	17	1	1	0	0
20	2	2	0	2	16	1	1	0	0
20	2	2	0	1	17	1	0	0	0
20	2	2	0	1	15	1	1	0	0
20	2	2	0	1	16	1	1	0	0
20	2	2	0	2	16	1	0	0	0
20	2	2	0	1	16	1	1	0	0
20	2	2	0	2	16	1	1	0	0
20	2	2	0	2	16	1	1	0	0
20	2	2	0	1	17	1	0	0	0
20	2	2	0	2	17	1	0	0	0
20	2	2	0	1	17	1	1	1	0
20	2	2	0	2	15	1	1	1	0
20	2	2	0	2	17	1	0	1	0
20	2	2	0	2	16	1	1	1	0
20	2	2	0	2	16	1	1	1	0
20	2	2	0	1	17	1	1	1	0
20	2	2	0	1	16	1	1	1	0
20	2	2	0	1	16	1	1	1	0
20	2	2	0	1	16	1	1	1	0
20	2	2	0	1	16	0	1	1	0
20	2	2	0	1	16	1	1	1	0
20	2	2	0	2	16	1	1	1	0
20	2	2	0	2	16	1	1	1	0
20	2	2	0	2	17	1	1	1	0
20	2	2	0	2	16	1	1	2	0
20	2	2	0	1	17	1	0	3	0
21	2	2	0	2	20	1	1	0	0
21	2	2	0	2	19	1	1	0	0
21	2	2	0	2	18	1	1	0	0
21	2	2	0	2	20	1	1	0	0
21	2	2	0	1	20	1	1	0	0
21	2	2	0	2	19	1	1	0	0
21	2	2	0	2	19	1	1	0	0
21	2	2	0	2	18	1	0	0	0
21	2	2	0	2	18	1	1	0	0
21	2	2	0	1	18	1	1	0	0
21	2	2	0	2	19	1	0	0	0
21	2	2	0	2	20	1	0	0	0
21	2	2	0	2	19	1	1	0	0
21	2	2	0	2	21	1	1	0	0
21	2	2	0	1	20	1	1	0	0
21	2	2	0	2	19	1	1	0	0
21	2	2	0	2	19	1	1	0	0
21	2	2	0	1	20	1	1	0	0
21	2	2	0	2	20	1	1	0	0
21	2	2	0	2	19	1	1	0	0
21	2	2	0	2	20	1	1	0	0
21	2	2	0	2	17	1	1	0	0
21	2	2	0	2	19	1	1	0	0
21	2	2	0	1	21	1	1	0	0
21	2	2	0	1	20	1	1	0	0
21	2	2	0	2	19	1	1	0	0
21	2	2	0	2	20	1	1	0	0
21	2	2	0	1	20	1	0	0	0
21	2	2	0	2	19	1	1	1	0
21	2	2	0	2	19	1	1	1	0
21	2	2	0	2	19	1	1	1	0
21	2	2	0	2	19	1	0	2	0
21	2	2	0	2	19	1	1	3	0
22	2	1	0	1	19	1	0	0	0
22	2	1	0	1	19	1	0	0	0
22	2	1	0	2	19	1	1	0	0
22	2	1	0	2	19	1	1	0	0
22	2	1	0	1	18	1	1	0	0
22	2	1	0	2	21	1	1	0	0
22	2	1	0	2	19	1	0	0	0
22	2	1	0	1	20	1	0	0	0
22	2	1	0	1	18	1	1	0	0
22	2	1	0	1	20	1	1	0	0
22	2	1	0	1	20	1	1	0	0
22	2	1	0	2	18	1	1	0	0
22	2	1	0	2	19	1	1	0	0
22	2	1	0	2	19	1	1	0	0
22	2	1	0	2	19	1	1	0	0
22	2	1	0	2	19	1	1	0	0
22	2	1	0	1	20	1	1	0	0
22	2	1	0	1	18	1	0	0	0
22	2	1	0	2	18	1	1	0	0
22	2	1	0	2	19	1	0	0	0
22	2	1	0	2	19	1	0	0	0
22	2	1	0	1	19	1	1	0	0
22	2	1	0	1	20	1	1	0	0
22	2	1	0	1	21	1	1	0	0
22	2	1	0	1	19	1	1	0	0
22	2	1	0	1	19	1	1	0	0
22	2	1	0	2	19	1	1	0	0
22	2	1	0	2	17	1	0	0	0
22	2	1	0	2	19	1	1	0	0
22	2	1	0	2	18	0	1	0	0
22	2	1	0	2	20	1	1	0	0
22	2	1	0	1	19	1	1	0	0
22	2	1	0	1	19	1	1	0	0
22	2	1	0	2	18	1	1	0	0
22	2	1	0	2	18	1	1	0	0
22	2	1	0	1	19	1	1	0	0
22	2	1	0	1	18	1	1	0	0
22	2	1	0	1	19	1	0	0	0
22	2	1	0	2	19	1	1	0	0
22	2	1	0	1	18	1	1	0	0
22	2	1	0	1	18	1	1	0	0
22	2	1	0	2	19	1	1	0	0
22	2	1	0	1	20	1	1	0	0
22	2	1	0	1	20	1	1	1	0
22	2	1	0	1	20	1	0	1	0
22	2	1	0	1	20	1	1	2	0
22	2	1	0	1	21	1	1	3	0
23	2	2	0	1	19	1	0	0	0
23	2	2	0	1	17	1	1	0	0
23	2	2	0	1	21	1	1	0	0
23	2	2	0	1	18	1	0	0	0
23	2	2	0	2	18	1	0	0	0
23	2	2	0	2	18	0	1	0	0
23	2	2	0	2	18	1	1	0	0
23	2	2	0	2	18	1	1	0	0
23	2	2	0	2	17	1	1	0	0
23	2	2	0	2	18	1	1	0	0
23	2	2	0	1	17	1	1	0	0
23	2	2	0	1	18	1	1	0	0
23	2	2	0	2	18	1	1	0	0
23	2	2	0	1	19	1	1	0	0
23	2	2	0	2	18	1	1	0	0
23	2	2	0	1	19	1	1	0	0
23	2	2	0	1	20	1	1	0	0
23	2	2	0	1	18	1	1	0	0
23	2	2	0	2	17	1	1	0	0
23	2	2	0	2	18	1	1	0	0
23	2	2	0	2	19	1	1	0	0
23	2	2	0	1	18	1	1	0	0
23	2	2	0	1	18	1	0	0	0
23	2	2	0	1	19	1	1	0	0
23	2	2	0	1	20	1	1	0	0
23	2	2	0	1	18	1	1	0	0
23	2	2	0	1	20	1	0	0	0
23	2	2	0	2	18	1	0	0	0
23	2	2	0	1	17	1	0	0	0
23	2	2	0	2	18	1	1	0	0
23	2	2	0	2	17	1	1	0	0
23	2	2	0	1	18	1	1	0	0
23	2	2	0	1	19	1	1	0	0
23	2	2	0	1	18	1	1	0	0
23	2	2	0	1	21	1	1	0	0
23	2	2	0	1	18	1	0	0	0
23	2	2	0	1	18	1	1	0	0
23	2	2	0	1	18	1	1	0	0
23	2	2	0	1	19	1	1	0	0
23	2	2	0	1	19	1	0	0	0
23	2	2	0	1	18	1	1	0	0
23	2	2	0	1	19	1	1	0	0
23	2	2	0	1	18	1	1	0	0
23	2	2	0	1	19	1	1	0	0
23	2	2	0	1	19	1	1	0	0
23	2	2	0	1	18	1	1	0	0
23	2	2	0	1	19	1	0	0	0
23	2	2	0	2	18	1	1	0	0
23	2	2	0	2	19	1	0	0	0
23	2	2	0	1	18	1	1	0	0
23	2	2	0	2	18	1	0	0	0
23	2	2	0	1	20	1	1	1	0
23	2	2	0	2	19	1	1	1	0
23	2	2	0	2	17	1	1	1	0
23	2	2	0	2	18	1	1	1	0
23	2	2	0	1	19	1	1	1	0
23	2	2	0	2	18	1	0	3	0
23	2	2	0	1	19	1	1	3	0
23	2	2	0	1	18	1	1	3	0
24	2	2	0	1	17	0	1	0	0
24	2	2	0	1	18	1	1	0	0
24	2	2	0	2	18	1	1	0	0
24	2	2	0	2	17	1	1	0	0
24	2	2	0	2	18	1	1	0	0
24	2	2	0	1	18	1	1	0	0
24	2	2	0	2	18	1	1	0	0
24	2	2	0	1	17	1	1	0	0
24	2	2	0	1	17	1	0	0	0
24	2	2	0	1	18	1	1	0	0
24	2	2	0	2	18	1	1	0	0
24	2	2	0	2	18	1	1	0	0
24	2	2	0	1	19	1	1	0	0
24	2	2	0	1	18	1	1	0	0
24	2	2	0	1	17	1	1	0	0
24	2	2	0	1	18	1	1	0	0
24	2	2	0	2	17	1	1	0	0
24	2	2	0	1	18	1	0	0	0
24	2	2	0	1	19	1	1	0	0
24	2	2	0	1	19	1	1	0	0
24	2	2	0	1	17	1	1	0	0
24	2	2	0	1	18	1	1	0	0
24	2	2	0	2	18	1	1	0	0
24	2	2	0	2	18	1	1	0	0
24	2	2	0	1	18	1	1	0	0
24	2	2	0	2	17	1	1	0	0
24	2	2	0	2	17	1	0	0	0
24	2	2	0	2	17	1	1	0	0
24	2	2	0	2	18	1	1	0	0
24	2	2	0	2	17	1	1	0	0
24	2	2	0	1	17	1	1	0	0
24	2	2	0	1	19	1	1	0	0
24	2	2	0	2	18	1	1	0	0
24	2	2	0	1	17	1	1	0	0
24	2	2	0	1	17	1	1	0	0
24	2	2	0	2	17	1	1	0	0
24	2	2	0	2	17	1	1	0	0
24	2	2	0	2	18	1	1	0	0
24	2	2	0	2	18	1	1	0	0
24	2	2	0	2	19	1	1	0	0
24	2	2	0	1	18	1	1	0	0
24	2	2	0	2	17	1	1	0	0
24	2	2	0	2	18	1	1	0	0
24	2	2	0	2	17	1	1	0	0
24	2	2	0	2	18	1	0	0	0
24	2	2	0	1	18	1	1	0	0
24	2	2	0	2	18	1	1	0	0
24	2	2	0	2	17	1	0	0	0
24	2	2	0	2	17	1	0	0	0
24	2	2	0	2	17	1	1	0	0
24	2	2	0	1	18	1	0	0	0
24	2	2	0	1	17	1	1	0	0
24	2	2	0	2	19	1	1	2	0
24	2	2	0	1	18	1	1	2	0
24	2	2	0	1	18	1	1	2	0
24	2	2	0	1	18	1	1	2	0
24	2	2	0	2	19	1	1	2	0
24	2	2	0	2	17	0	1	3	0
24	2	2	0	2	18	1	1	3	0
24	2	2	0	2	19	1	1	3	0
24	2	2	0	2	17	1	1	3	0
25	2	1	0	2	17	0	1	0	0
25	2	1	0	2	18	0	1	0	0
25	2	1	0	2	16	0	1	0	0
25	2	1	0	2	17	0	1	0	0
25	2	1	0	2	17	1	1	0	0
25	2	1	0	2	17	0	1	0	0
25	2	1	0	2	16	0	1	0	0
25	2	1	0	2	16	0	1	0	0
25	2	1	0	1	17	1	1	0	0
25	2	1	0	2	16	1	1	0	0
25	2	1	0	1	16	1	0	0	0
25	2	1	0	2	17	0	1	0	0
25	2	1	0	2	17	1	1	0	0
25	2	1	0	2	17	0	1	0	0
25	2	1	0	2	17	0	1	0	0
25	2	1	0	2	17	1	1	0	0
25	2	1	0	2	17	0	1	0	0
25	2	1	0	1	17	0	1	0	0
25	2	1	0	1	17	0	0	0	0
25	2	1	0	2	16	1	1	0	0
25	2	1	0	1	16	0	0	0	0
25	2	1	0	1	16	0	0	0	0
25	2	1	0	1	18	0	1	0	0
25	2	1	0	1	17	1	1	0	0
25	2	1	0	2	17	0	1	0	0
25	2	1	0	2	17	0	1	0	0
25	2	1	0	1	18	0	1	0	0
25	2	1	0	2	16	0	1	0	0
25	2	1	0	1	17	0	1	0	0
25	2	1	0	1	17	0	1	0	0
25	2	1	0	2	17	0	0	0	0
25	2	1	0	2	17	0	1	0	0
25	2	1	0	2	18	0	1	0	0
25	2	1	0	2	17	0	1	0	0
25	2	1	0	2	17	1	1	0	0
25	2	1	0	2	17	1	1	0	0
25	2	1	0	2	17	0	1	0	0
25	2	1	0	2	17	1	1	0	0
25	2	1	0	2	17	1	1	0	0
25	2	1	0	2	17	0	1	0	0
25	2	1	0	2	17	0	1	0	0
25	2	1	0	2	16	0	1	0	0
25	2	1	0	2	17	0	1	0	0
25	2	1	0	2	16	0	1	0	0
25	2	1	0	2	17	0	1	0	0
25	2	1	0	2	16	1	1	0	0
25	2	1	0	2	18	0	1	1	0
25	2	1	0	2	17	0	1	1	0
25	2	1	0	1	16	0	1	2	0
25	2	1	0	2	17	0	1	2	0
26	2	2	0	2	18	0	0	0	0
26	2	2	0	2	18	0	1	0	0
26	2	2	0	1	17	0	1	0	0
26	2	2	0	2	17	1	1	0	0
26	2	2	0	2	17	0	1	0	0
26	2	2	0	2	20	1	1	0	0
26	2	2	0	2	18	0	1	0	0
26	2	2	0	2	18	0	1	0	0
26	2	2	0	2	18	0	1	0	0
26	2	2	0	2	19	0	1	0	0
26	2	2	0	1	19	0	1	0	0
26	2	2	0	2	19	0	1	0	0
26	2	2	0	2	17	0	1	0	0
26	2	2	0	1	18	0	0	0	0
26	2	2	0	2	17	0	1	0	0
26	2	2	0	2	18	0	1	0	0
26	2	2	0	2	18	0	1	0	0
26	2	2	0	2	18	0	1	0	0
26	2	2	0	2	18	0	1	0	0
26	2	2	0	2	18	0	1	0	0
26	2	2	0	2	17	0	1	0	0
26	2	2	0	1	19	0	1	0	0
26	2	2	0	2	18	0	1	0	0
26	2	2	0	2	17	1	1	0	0
26	2	2	0	2	18	0	1	0	0
26	2	2	0	2	18	0	1	0	0
26	2	2	0	1	18	0	1	0	0
26	2	2	0	1	18	0	0	0	0
26	2	2	0	1	18	0	1	0	0
26	2	2	0	2	18	1	1	0	0
26	2	2	0	2	19	0	1	0	0
26	2	2	0	2	19	0	1	0	0
26	2	2	0	2	18	0	1	0	0
26	2	2	0	2	18	0	1	0	0
26	2	2	0	2	19	0	0	0	0
26	2	2	0	1	18	1	1	0	0
26	2	2	0	2	18	0	1	0	0
26	2	2	0	2	18	0	1	0	0
26	2	2	0	2	18	1	0	0	0
26	2	2	0	2	19	0	1	0	0
26	2	2	0	2	18	0	0	0	0
26	2	2	0	2	18	0	1	0	0
26	2	2	0	1	19	0	1	0	0
26	2	2	0	2	18	1	1	0	0
26	2	2	0	1	19	0	0	0	0
26	2	2	0	1	19	0	1	1	0
26	2	2	0	2	18	0	1	1	0
26	2	2	0	1	18	0	1	1	0
26	2	2	0	2	18	0	1	2	0
26	2	2	0	2	13	0	1	2	0
27	2	2	1	2	15	0	1	0	0
27	2	2	1	2	14	1	1	0	0
27	2	2	1	2	15	1	1	0	0
27	2	2	1	2	14	1	1	0	0
27	2	2	1	2	14	0	1	0	0
27	2	2	1	1	15	1	0	0	0
27	2	2	1	1	14	1	1	0	0
27	2	2	1	1	15	1	1	0	0
27	2	2	1	2	15	1	1	0	0
27	2	2	1	2	15	0	1	0	0
27	2	2	1	1	15	1	1	0	0
27	2	2	1	1	14	1	1	0	0
27	2	2	1	1	15	1	1	0	0
27	2	2	1	1	14	1	1	0	0
27	2	2	1	2	14	0	1	0	0
27	2	2	1	2	14	1	1	0	0
27	2	2	1	2	13	1	1	0	0
27	2	2	1	1	14	1	1	0	0
27	2	2	1	1	15	1	0	0	0
27	2	2	1	2	15	1	1	0	0
27	2	2	1	2	14	1	1	0	0
27	2	2	1	2	15	1	0	0	0
27	2	2	1	1	15	1	1	0	0
27	2	2	1	1	14	1	1	0	0
27	2	2	1	1	16	1	0	0	0
27	2	2	1	1	14	1	0	0	0
27	2	2	1	2	14	1	1	0	0
27	2	2	1	2	14	0	0	0	0
27	2	2	1	2	15	1	0	0	0
27	2	2	1	2	14	1	0	0	0
27	2	2	1	2	15	1	0	0	0
27	2	2	1	2	15	1	1	0	0
27	2	2	1	2	14	1	1	0	0
27	2	2	1	2	14	1	1	0	0
27	2	2	1	1	13	1	1	0	0
27	2	2	1	1	15	1	1	0	0
27	2	2	1	2	13	0	0	0	0
27	2	2	1	2	15	0	1	0	0
27	2	2	1	2	14	1	1	0	0
27	2	2	1	2	15	1	1	0	0
27	2	2	1	1	15	1	1	0	0
27	2	2	1	1	15	1	0	0	0
27	2	2	1	1	15	1	0	0	0
27	2	2	1	1	16	1	1	0	0
27	2	2	1	2	15	1	1	0	0
27	2	2	1	2	15	1	1	0	0
27	2	2	1	2	15	1	1	0	0
27	2	2	1	1	14	1	1	0	0
27	2	2	1	1	14	1	1	0	0
27	2	2	1	1	16	1	1	0	0
27	2	2	1	1	15	1	1	0	0
27	2	2	1	2	14	1	1	0	0
27	2	2	1	2	14	1	0	0	0
27	2	2	1	2	14	1	1	0	0
27	2	2	1	1	14	1	1	0	0
27	2	2	1	1	14	1	1	0	0
27	2	2	1	2	14	1	1	0	0
27	2	2	1	2	14	1	0	0	0
27	2	2	1	2	14	1	0	0	0
27	2	2	1	1	15	1	1	0	0
27	2	2	1	1	14	1	1	0	0
27	2	2	1	1	15	1	1	0	0
27	2	2	1	2	15	1	1	0	0
27	2	2	1	2	15	1	1	0	0
27	2	2	1	1	16	1	1	0	0
27	2	2	1	1	14	1	1	2	0
27	2	2	1	2	14	1	1	3	0
28	2	1	0	1	19	1	1	0	0
28	2	1	0	1	18	1	1	0	0
28	2	1	0	1	18	1	1	0	0
28	2	1	0	2	19	1	1	0	0
28	2	1	0	2	19	1	1	0	0
28	2	1	0	1	18	1	1	0	0
28	2	1	0	1	18	1	0	0	0
28	2	1	0	1	18	1	1	0	0
28	2	1	0	1	19	1	1	0	0
28	2	1	0	1	18	1	1	0	0
28	2	1	0	1	18	1	1	0	0
28	2	1	0	1	18	1	1	0	0
28	2	1	0	1	17	1	1	0	0
28	2	1	0	1	19	1	1	0	0
28	2	1	0	1	19	1	1	0	0
28	2	1	0	1	18	1	1	0	0
28	2	1	0	1	17	1	1	0	0
28	2	1	0	2	19	1	1	0	0
28	2	1	0	2	18	1	1	0	0
28	2	1	0	2	18	1	1	0	0
28	2	1	0	2	17	1	1	0	0
28	2	1	0	2	18	1	1	0	0
28	2	1	0	2	18	1	1	0	0
28	2	1	0	2	18	1	1	0	0
28	2	1	0	1	17	1	1	0	0
28	2	1	0	1	18	1	0	0	0
28	2	1	0	1	17	1	1	0	0
28	2	1	0	1	19	1	1	0	0
28	2	1	0	1	20	1	1	0	0
28	2	1	0	1	18	1	1	0	0
28	2	1	0	1	19	1	1	0	0
28	2	1	0	1	18	1	1	0	0
28	2	1	0	1	19	1	1	0	0
28	2	1	0	1	18	1	1	0	0
28	2	1	0	2	20	1	1	0	0
28	2	1	0	2	18	1	0	0	0
28	2	1	0	1	18	1	1	0	0
28	2	1	0	1	18	1	1	0	0
28	2	1	0	1	19	1	1	0	0
28	2	1	0	1	17	1	1	0	0
28	2	1	0	1	19	1	1	0	0
28	2	1	0	1	18	1	1	3	0
29	2	1	1	1	15	1	1	0	0
29	2	1	1	1	15	1	1	0	0
29	2	1	1	2	14	1	0	0	0
29	2	1	1	2	16	1	0	0	0
29	2	1	1	1	16	0	1	0	0
29	2	1	1	1	16	1	1	0	0
29	2	1	1	2	14	1	1	0	0
29	2	1	1	2	15	1	1	0	0
29	2	1	1	2	15	1	0	0	0
29	2	1	1	1	13	1	0	0	0
29	2	1	1	2	14	1	0	0	0
29	2	1	1	2	15	1	0	0	0
29	2	1	1	2	14	1	1	0	0
29	2	1	1	2	14	1	1	0	0
29	2	1	1	1	14	1	1	0	0
29	2	1	1	2	15	1	0	0	0
29	2	1	1	2	15	1	1	0	0
29	2	1	1	2	15	1	1	0	0
29	2	1	1	1	15	0	1	0	0
29	2	1	1	2	16	0	1	0	0
29	2	1	1	1	14	1	1	0	0
29	2	1	1	1	15	1	1	0	0
29	2	1	1	1	15	1	1	0	0
29	2	1	1	1	14	1	0	0	0
29	2	1	1	2	16	0	1	0	0
29	2	1	1	1	16	1	1	0	0
29	2	1	1	2	15	1	1	0	0
29	2	1	1	2	14	1	0	0	0
29	2	1	1	2	14	0	1	0	0
29	2	1	1	2	16	1	1	0	0
29	2	1	1	1	15	1	1	0	0
29	2	1	1	1	16	1	1	0	0
29	2	1	1	1	16	1	1	0	0
29	2	1	1	1	16	1	1	0	0
29	2	1	1	1	15	1	0	0	0
29	2	1	1	1	17	0	1	0	0
29	2	1	1	2	15	1	1	0	0
29	2	1	1	1	15	1	1	0	0
29	2	1	1	2	15	0	1	0	0
29	2	1	1	1	15	1	0	0	0
29	2	1	1	2	15	1	0	0	0
29	2	1	1	1	15	1	0	0	0
29	2	1	1	2	15	1	0	0	0
29	2	1	1	2	14	1	1	0	0
29	2	1	1	2	14	1	1	0	0
29	2	1	1	2	14	1	1	0	0
29	2	1	1	2	15	1	1	0	0
30	2	1	0	2	19	1	1	0	0
30	2	1	0	2	18	1	1	0	0
30	2	1	0	1	20	1	0	0	0
30	2	1	0	2	17	1	1	0	0
30	2	1	0	2	19	1	0	0	0
30	2	1	0	1	18	1	1	0	0
30	2	1	0	2	19	1	1	0	0
30	2	1	0	2	18	1	0	0	0
30	2	1	0	2	17	1	0	0	0
30	2	1	0	2	18	1	1	0	0
30	2	1	0	1	14	1	1	0	0
30	2	1	0	1	18	1	1	0	0
30	2	1	0	2	17	1	1	0	0
30	2	1	0	2	18	0	0	0	0
30	2	1	0	2	17	1	1	0	0
30	2	1	0	1	19	1	1	0	0
30	2	1	0	1	18	1	1	0	0
30	2	1	0	1	19	1	1	0	0
30	2	1	0	2	17	1	1	0	0
30	2	1	0	1	19	0	0	0	0
30	2	1	0	1	19	1	1	0	0
30	2	1	0	1	18	1	0	0	0
30	2	1	0	1	18	1	0	0	0
30	2	1	0	1	17	1	0	0	0
30	2	1	0	1	20	1	0	0	0
30	2	1	0	1	18	1	0	0	0
30	2	1	0	1	18	1	1	0	0
30	2	1	0	1	17	1	0	0	0
30	2	1	0	1	20	1	1	0	0
30	2	1	0	1	18	1	0	0	0
30	2	1	0	1	18	1	0	0	0
30	2	1	0	1	16	0	0	0	0
30	2	1	0	1	21	1	1	0	0
30	2	1	0	2	17	1	1	0	0
30	2	1	0	1	18	0	1	0	0
30	2	1	0	1	18	1	1	0	0
30	2	1	0	2	17	1	1	0	0
30	2	1	0	2	18	1	1	0	0
30	2	1	0	1	18	0	1	0	0
30	2	1	0	2	18	1	1	0	0
30	2	1	0	1	17	1	0	0	0
30	2	1	0	2	18	1	0	0	0
30	2	1	0	2	17	1	0	0	0
30	2	1	0	2	17	1	0	0	0
30	2	1	0	2	19	1	1	0	0
30	2	1	0	2	19	1	1	0	0
30	2	1	0	2	18	1	1	0	0
30	2	1	0	2	17	1	1	0	0
30	2	1	0	2	18	1	1	0	0
30	2	1	0	2	17	1	1	0	0
30	2	1	0	1	18	1	1	0	0
30	2	1	0	2	17	1	1	0	0
30	2	1	0	1	19	0	1	0	0
30	2	1	0	1	18	1	1	0	0
30	2	1	0	1	19	1	1	0	0
30	2	1	0	2	19	1	1	0	0
30	2	1	0	2	20	1	1	0	0
30	2	1	0	2	19	1	1	0	0
30	2	1	0	1	18	1	1	0	0
30	2	1	0	1	19	1	1	0	0
30	2	1	0	1	18	1	1	0	0
30	2	1	0	1	18	1	0	0	0
30	2	1	0	2	18	1	0	0	0
30	2	1	0	2	19	1	1	0	0
31	2	1	1	2	16	1	1	0	0
31	2	1	1	1	15	1	1	0	0
31	2	1	1	1	16	1	1	0	0
31	2	1	1	2	16	1	0	0	0
31	2	1	1	1	16	1	0	0	0
31	2	1	1	1	15	1	0	0	0
31	2	1	1	1	16	1	0	0	0
31	2	1	1	2	16	1	0	0	0
31	2	1	1	1	15	1	0	0	0
31	2	1	1	1	15	1	1	0	0
31	2	1	1	1	15	1	1	0	0
31	2	1	1	2	16	1	0	0	0
31	2	1	1	2	16	1	0	0	0
31	2	1	1	2	15	1	0	0	0
31	2	1	1	2	15	1	1	0	0
31	2	1	1	2	14	1	0	0	0
31	2	1	1	2	16	1	0	0	0
31	2	1	1	2	16	1	1	0	0
31	2	1	1	2	16	1	1	0	0
31	2	1	1	2	15	1	1	0	0
31	2	1	1	2	15	1	0	0	0
31	2	1	1	2	16	1	0	0	0
31	2	1	1	2	15	1	0	0	0
31	2	1	1	2	16	1	1	0	0
31	2	1	1	2	16	1	1	0	0
31	2	1	1	1	15	1	0	0	0
31	2	1	1	1	16	1	0	0	0
31	2	1	1	2	15	1	1	0	0
31	2	1	1	1	15	1	1	0	0
31	2	1	1	1	15	1	1	0	0
31	2	1	1	1	15	1	1	0	0
31	2	1	1	1	15	1	1	0	0
31	2	1	1	1	15	1	1	0	0
31	2	1	1	2	15	1	0	0	0
31	2	1	1	2	15	1	1	0	0
31	2	1	1	2	16	1	0	0	0
31	2	1	1	2	15	1	0	0	0
31	2	1	1	1	15	1	0	0	0
31	2	1	1	1	16	1	1	0	0
31	2	1	1	1	16	1	1	0	0
31	2	1	1	2	15	1	0	2	0
32	2	1	1	2	14	0	1	0	0
32	2	1	1	2	15	0	1	0	0
32	2	1	1	2	15	0	1	0	0
32	2	1	1	2	16	0	1	0	0
32	2	1	1	2	16	0	1	0	0
32	2	1	1	2	15	0	1	0	0
32	2	1	1	2	15	1	1	0	0
32	2	1	1	2	16	0	1	0	0
32	2	1	1	1	16	0	1	0	0
32	2	1	1	2	15	0	1	0	0
32	2	1	1	2	16	1	1	0	0
32	2	1	1	2	16	1	1	0	0
32	2	1	1	2	16	0	1	0	0
32	2	1	1	2	16	0	1	0	0
32	2	1	1	1	16	0	1	0	0
32	2	1	1	2	15	1	1	0	0
32	2	1	1	2	15	1	1	0	0
32	2	1	1	1	15	1	1	0	0
32	2	1	1	2	16	0	1	0	0
32	2	1	1	1	16	0	1	0	0
32	2	1	1	1	15	0	1	0	0
32	2	1	1	1	15	0	1	0	0
32	2	1	1	2	15	0	1	0	0
32	2	1	1	1	15	1	1	0	0
32	2	1	1	2	15	0	1	0	0
32	2	1	1	2	16	0	1	0	0
32	2	1	1	2	15	0	1	0	0
32	2	1	1	2	15	0	1	0	0
32	2	1	1	2	15	0	1	0	0
32	2	1	1	2	15	0	1	0	0
32	2	1	1	2	16	0	1	0	0
32	2	1	1	2	15	0	1	0	0
32	2	1	1	2	15	0	1	0	0
32	2	1	1	1	15	0	1	0	0
32	2	1	1	1	15	0	1	0	0
32	2	1	1	2	15	0	1	0	0
32	2	1	1	1	16	0	1	1	0
32	2	1	1	1	17	0	1	1	0
32	2	1	1	1	15	0	1	1	0
32	2	1	1	1	15	1	1	1	0
32	2	1	1	1	16	0	1	1	0
32	2	1	1	1	16	0	1	1	0
32	2	1	1	2	15	1	1	1	0
32	2	1	1	1	16	0	1	1	0
32	2	1	1	2	16	0	1	2	0
32	2	1	1	1	15	0	1	2	0
32	2	1	1	2	15	0	1	2	0
32	2	1	1	2	15	1	1	2	0
32	2	1	1	2	15	1	1	3	0
32	2	1	1	1	15	0	1	3	0
32	2	1	1	2	15	1	0	3	0
32	2	1	1	1	16	0	1	3	0
32	2	1	1	1	15	0	1	3	0
32	2	1	1	1	16	0	1	3	0
32	2	1	1	2	15	0	1	3	0
32	2	1	1	1	17	0	1	4	1
32	2	1	1	2	15	1	1	4	1
32	2	1	1	1	15	0	1	4	1
33	2	2	0	1	18	1	1	0	0
33	2	2	0	1	17	1	0	0	0
33	2	2	0	1	19	1	0	0	0
33	2	2	0	1	18	1	1	0	0
33	2	2	0	1	19	0	0	0	0
33	2	2	0	1	19	1	0	0	0
33	2	2	0	1	19	0	1	0	0
33	2	2	0	1	20	0	0	0	0
33	2	2	0	2	18	1	1	0	0
33	2	2	0	2	18	0	1	0	0
33	2	2	0	2	18	0	1	0	0
33	2	2	0	1	18	0	1	0	0
33	2	2	0	1	18	0	0	0	0
33	2	2	0	1	18	0	0	0	0
33	2	2	0	1	17	0	1	0	0
33	2	2	0	2	19	0	0	0	0
33	2	2	0	2	18	0	1	0	0
33	2	2	0	2	18	0	1	0	0
33	2	2	0	2	19	0	1	0	0
33	2	2	0	2	12	0	1	0	0
33	2	2	0	2	17	1	1	0	0
33	2	2	0	1	19	0	1	0	0
33	2	2	0	1	18	0	1	0	0
33	2	2	0	1	18	0	1	0	0
33	2	2	0	1	18	1	1	0	0
33	2	2	0	2	18	0	1	0	0
33	2	2	0	1	19	0	0	0	0
33	2	2	0	1	20	0	1	0	0
33	2	2	0	2	17	0	1	0	0
33	2	2	0	1	18	0	0	0	0
33	2	2	0	2	18	1	1	0	0
33	2	2	0	1	19	0	0	0	0
33	2	2	0	1	18	0	1	0	0
33	2	2	0	1	18	1	0	0	0
33	2	2	0	1	18	0	0	0	0
33	2	2	0	2	18	0	1	0	0
33	2	2	0	1	18	1	1	0	0
33	2	2	0	1	18	1	1	0	0
33	2	2	0	2	18	0	1	0	0
33	2	2	0	2	18	0	1	0	0
33	2	2	0	2	19	0	1	0	0
33	2	2	0	2	17	0	1	0	0
33	2	2	0	2	20	0	1	0	0
33	2	2	0	2	19	0	1	0	0
33	2	2	0	2	18	0	1	0	0
33	2	2	0	2	18	0	1	0	0
33	2	2	0	2	18	0	1	0	0
33	2	2	0	1	18	0	1	0	0
33	2	2	0	1	18	0	1	0	0
33	2	2	0	1	18	0	0	0	0
33	2	2	0	2	20	0	0	0	0
33	2	2	0	1	19	0	0	0	0
34	2	2	1	1	16	0	0	0	0
34	2	2	1	1	15	0	0	0	0
34	2	2	1	1	16	0	0	0	0
34	2	2	1	1	16	0	0	0	0
34	2	2	1	1	15	0	1	0	0
34	2	2	1	2	16	0	1	0	0
34	2	2	1	2	15	0	0	0	0
34	2	2	1	2	15	0	0	0	0
34	2	2	1	2	14	0	1	0	0
34	2	2	1	2	15	0	0	0	0
34	2	2	1	1	15	0	0	0	0
34	2	2	1	1	15	0	0	0	0
34	2	2	1	1	15	0	1	0	0
34	2	2	1	1	14	0	1	0	0
34	2	2	1	1	16	0	1	0	0
34	2	2	1	1	15	0	1	0	0
34	2	2	1	1	15	0	0	0	0
34	2	2	1	1	15	0	0	0	0
34	2	2	1	1	15	0	1	0	0
34	2	2	1	1	15	0	1	0	0
34	2	2	1	1	15	0	1	0	0
34	2	2	1	2	16	0	1	0	0
34	2	2	1	2	15	0	0	0	0
34	2	2	1	2	15	0	0	0	0
34	2	2	1	2	16	0	0	0	0
34	2	2	1	2	15	0	1	0	0
34	2	2	1	2	15	0	0	0	0
34	2	2	1	2	15	0	0	0	0
34	2	2	1	2	15	0	0	0	0
34	2	2	1	2	15	0	1	0	0
34	2	2	1	2	16	0	0	0	0
34	2	2	1	2	15	0	0	0	0
34	2	2	1	2	15	0	1	0	0
34	2	2	1	2	16	0	1	0	0
34	2	2	1	1	17	0	0	0	0
34	2	2	1	1	15	0	1	0	0
34	2	2	1	1	16	0	0	0	0
34	2	2	1	1	16	0	0	0	0
34	2	2	1	1	15	0	0	0	0
34	2	2	1	1	16	0	1	0	0
34	2	2	1	1	15	0	0	0	0
34	2	2	1	1	15	0	1	0	0
34	2	2	1	2	16	0	0	0	0
34	2	2	1	2	15	0	0	0	0
34	2	2	1	2	16	0	1	0	0
34	2	2	1	2	15	0	1	0	0
34	2	2	1	2	16	1	0	0	0
34	2	2	1	2	14	0	0	0	0
34	2	2	1	2	15	0	0	0	0
34	2	2	1	1	15	0	1	1	0
34	2	2	1	2	14	0	1	1	0
35	2	1	0	2	16	0	1	0	0
35	2	1	0	1	18	0	0	0	0
35	2	1	0	2	19	0	1	0	0
35	2	1	0	1	18	0	1	0	0
35	2	1	0	1	16	0	1	0	0
35	2	1	0	2	16	0	1	0	0
35	2	1	0	2	17	0	1	0	0
35	2	1	0	2	17	0	1	0	0
35	2	1	0	1	19	0	0	0	0
35	2	1	0	1	17	0	1	0	0
35	2	1	0	2	17	0	0	0	0
35	2	1	0	1	16	0	1	0	0
35	2	1	0	1	17	1	1	0	0
35	2	1	0	2	18	0	0	0	0
35	2	1	0	2	16	1	1	0	0
35	2	1	0	1	16	1	1	0	0
35	2	1	0	1	18	0	0	0	0
35	2	1	0	2	18	0	1	0	0
35	2	1	0	1	16	0	0	0	0
35	2	1	0	1	16	0	1	0	0
35	2	1	0	2	18	0	0	0	0
35	2	1	0	1	16	1	1	0	0
35	2	1	0	1	16	1	1	0	0
35	2	1	0	2	17	1	1	0	0
35	2	1	0	2	17	0	1	0	0
35	2	1	0	2	19	0	0	0	0
35	2	1	0	2	17	0	1	0	0
35	2	1	0	1	16	0	0	0	0
35	2	1	0	2	17	0	1	0	0
35	2	1	0	2	17	0	1	0	0
35	2	1	0	1	15	1	1	0	0
35	2	1	0	2	19	0	1	0	0
35	2	1	0	2	18	0	1	0	0
35	2	1	0	1	16	0	1	0	0
35	2	1	0	1	16	0	1	0	0
35	2	1	0	1	16	0	0	0	0
35	2	1	0	1	17	0	1	1	0
35	2	1	0	1	16	0	0	1	0
35	2	1	0	2	16	0	1	1	0
35	2	1	0	1	17	1	1	1	0
35	2	1	0	1	16	0	1	1	0
35	2	1	0	1	17	0	1	1	0
35	2	1	0	1	17	0	1	1	0
35	2	1	0	2	17	0	0	1	0
35	2	1	0	1	16	0	1	1	0
35	2	1	0	2	19	1	1	1	0
35	2	1	0	1	12	0	1	1	0
35	2	1	0	2	17	0	0	1	0
35	2	1	0	2	16	0	1	1	0
35	2	1	0	1	15	0	0	1	0
35	2	1	0	2	17	0	1	1	0
35	2	1	0	2	16	0	1	1	0
35	2	1	0	1	18	0	0	1	0
35	2	1	0	1	17	0	1	1	0
35	2	1	0	1	18	0	1	1	0
35	2	1	0	2	18	1	1	1	0
35	2	1	0	1	17	0	1	1	0
35	2	1	0	1	17	0	0	3	0
35	2	1	0	1	19	0	1	3	0
36	2	1	1	2	15	1	1	0	0
36	2	1	1	1	14	0	1	0	0
36	2	1	1	1	14	0	1	0	0
36	2	1	1	1	15	0	0	0	0
36	2	1	1	2	14	0	1	0	0
36	2	1	1	1	14	0	1	0	0
36	2	1	1	2	15	0	1	0	0
36	2	1	1	2	14	0	1	0	0
36	2	1	1	2	14	0	1	0	0
36	2	1	1	1	14	0	1	0	0
36	2	1	1	2	14	0	1	0	0
36	2	1	1	1	14	0	1	0	0
36	2	1	1	1	15	0	1	0	0
36	2	1	1	2	14	0	1	0	0
36	2	1	1	1	14	0	1	0	0
36	2	1	1	1	15	0	1	0	0
36	2	1	1	1	15	1	1	0	0
36	2	1	1	1	15	0	0	0	0
36	2	1	1	2	13	0	1	0	0
36	2	1	1	2	14	0	1	0	0
36	2	1	1	2	14	1	1	0	0
36	2	1	1	2	15	0	1	0	0
[truncated: 4,513 more rows]
