# Supplementary material for: Infectivity of Mycobacterium tuberculosis Genotypes and Outcome of Contact Investigation in Classroom in Guangxi, China
Source: Biomed Res Int. 2019 Apr 14;2019:3980658. doi: 10.1155/2019/3980658 (PMC6487147; doi:10.1155/2019/3980658)
Supplement: Supplementary Materials — (1) Supplementary materials file “Index case.xlsx” is the dataset for Table 1 of the manuscript, “Characteristics of index cases by genotypes of M.tb (N=117)”. (2) Supplementary materials file “Contact.xlsx” is the dataset for Table 2 and Figures 1, 4(a), and 4(b) of the manuscript. (3) Supplementary materials file “Genotype.xlsx” is the dataset for Figures 2 and 3 of the manuscript. [file 3980658.f1.zip › 3980658/Genotype.xlsx]

## Sheet: Sheet1
ID	Mtub04	ETRC	MIRU04	MIRU40	MIRU10	MIRU16	Mtub21	QUB11b	ETRA	Mtub30	MIRU26	ETRE	Mtub39	QUB26	QUB4156	Spoligotype43	Lineage
1	2	4	3	3	3	4	7	6	4	5	7	5	4	8	2	000000000003771	Beijing
2	4	4	3	3	1	4	4	6	4	5	5	5	4	8		000000000003731	Beijing
3	4	4	3	3	3	4	5	6	4	5	7	5	4	7	2	000000000003771	Beijing
4	2	4	3	4		4	3	3	3	2	5	3	4		2	777777777760771	NEW-1
5	2	4	3	3	2	4	3	2	3	2	5	2	4	7	2	777777777760771	NEW-1
6	4	4	6	2	2	5	1			2	5	2	2	5	2	777777777760771	S
7	5	4	4	4	2	4	1	5	4	2	4	3	2	7	2	777777777760731	S
8	2	2	3	4	2	2	3	3	3	2	4	3	4	7	2	777777777760771	NEW-1
9	3	4	3	2	5	1	2	1	3	5	1	3	4	7	3	577777777760771	URAL
10	5	4	4	2	2	4	1	5	4	2	4	3	2	7	2	777777777760731	S
11	2	4	3	3	3	4	7	6	4	5	7	5	4	8	2	000000000003771	Beijing
12	4	4	3	3	3		4	7	4	2	7	5	3	7		000000000003771	Beijing
13	4	4	3	3	3		3	7	4	5	7	5	4	9	2	000000000003771	Beijing
14	4	4	6	2	2	4	1	5	3	2	5	3	2	8	2	777777777760731	S
15	3	4	3	2	5	1	3	1	2	5	1	3	4	8	3	577777777760700	URAL
16	3	4	3	3	2	4	5	6	4	5	7	5	4	8	2	000000000003771	Beijing
17	2	4	3	4	2	4		3	2	2	2	3	4	7	2	003777777760771	NEW-1
18	2	4	3	4	2	4		3	2	2	2	3	4	7	2	003777777760771	NEW-1
19	4	4	3	4	3	4	4	6	4	5	10	5	5	8		000000000003771	Beijing
20	2	4	3	3	2	4	3	2	3	2	5	3	4	8	2	777777777720711	NEW-1
