# Supplementary material for: Infectivity of Mycobacterium tuberculosis Genotypes and Outcome of Contact Investigation in Classroom in Guangxi, China
Source: Biomed Res Int. 2019 Apr 14;2019:3980658. doi: 10.1155/2019/3980658 (PMC6487147; doi:10.1155/2019/3980658)
Supplement: Supplementary Materials — (1) Supplementary materials file “Index case.xlsx” is the dataset for Table 1 of the manuscript, “Characteristics of index cases by genotypes of M.tb (N=117)”. (2) Supplementary materials file “Contact.xlsx” is the dataset for Table 2 and Figures 1, 4(a), and 4(b) of the manuscript. (3) Supplementary materials file “Genotype.xlsx” is the dataset for Figures 2 and 3 of the manuscript. [file 3980658.f1.zip › 3980658/Index case.xlsx]

## Sheet: Sheet1
Index ID	Cavity on chest	Genotype of index case	Sputum smear status	Ethnicity	Sex	BCG scar	School type
1	0	2	0	0	2	1	0
2	0	0	1	0	2	1	0
3	1	0	1	0	2	1	1
4	1	0	1	1	1	1	1
5	1	0	1	1	2	0	0
6	0	0	0	1	2	0	0
7	1	0	1	1	2	0	1
8	1	0	1	1	2	0	1
9	1	0	1	1	1	1	1
10	1	2	1	1	2	0	0
11	1	0	1	1	1	0	1
12	0	0	0	1	2	0	0
13	0	0	1	1	1	1	1
14	0	0	0	1	2	0	0
15	0	0	0	1	1	1	0
16	0	0	1	1	2	0	1
17	0	0	0	1	1	1	1
18	1	0	1	0	1	0	0
19	0	0	0	0	1	1	0
20	1	0	0	1	2	0	1
21	0	0	0	1	2	1	1
22	0	0	0	0	1	1	1
23	0	0	0	1	2	0	1
24	0	0	0	1	2	1	1
25	0	0	0	0	1	0	1
26	0	0	0	0	2	1	1
27	1	0	1	0	2	1	0
28	0	0	0	1	1	1	1
29	1	0	1	1	1	1	0
30	1	0	1	1	1	1	1
31	0	0	0	1	1	0	0
32	1	0	1	0	1	1	0
33	0	0	1	1	2	1	1
34	1	0	1	0	2	0	0
35	1	0	0	0	1	0	1
36	1	0	1	0	1	1	0
37	0	0	0	0	1	1	1
38	0	0	1	0	2	1	0
39	0	0	0	0	2	1	1
40	0	0	0	1	2	1	1
41	0	0	0	1	1	1	0
42	1	0	1	1	1	1	0
43	0	0	0	1	2	1	1
44	0	0	0	0	1	1	1
45	0	0	0	1	2	0	1
46	0	0	1	1	2	1	1
47	0	0	0	1	2	0	0
48	0	0	0	0	1	1	1
49	0	0	0	0	2	1	0
50	0	0	0	0	1	1	0
51	0	0	0	0	2	1	0
52	0	0	0	0	2	1	0
53	0	0	0	0	1	0	0
54	0	0	0	0	2	1	1
55	0	0	1	0	1	0	1
56	0	0	1	1	2	0	0
57	1	0	1	1	1	1	1
58	1	0	1	1	1	1	1
59	0	0	0	1	2	1	1
60	0	0	1	1	2	1	1
61	0	0	0	0	2	1	0
62	0	0	0	0	2	1	1
63	0	0	0	0	2	1	1
64	1	0	1	1	1	1	1
65	1	0	1	1	2	1	1
66	1	0	1	1	2	0	1
67	1	0	1	1	1	0	1
68	0	0	0	1	1	0	1
69	1	0	0	1	1	1	0
70	0	0	0	0	1	1	0
71	0	0	0	1	1	1	1
72	0	0	0	1	2	0	0
73	0	0	0	0	1	1	1
74	0	0	0	0	2	1	1
75	0	0	0	0	2	0	0
76	0	0	0	0	2	1	1
77	0	0	1	0	1	1	0
78	1	0	1	1	2	1	0
79	0	0	0	1	1	1	0
80	1	0	1	1	2	0	1
81	1	2	1	1	2	0	1
82	1	1	1	1	2	0	1
83	0	0	0	0	1	1	1
84	1	1	1	0	1	0	1
85	0	0	0	0	1	0	1
86	0	0	0	0	1	0	1
87	0	1	1	0	1	0	1
88	1	1	1	1	1	1	1
89	0	0	0	1	1	1	0
90	0	0	0	0	2	1	1
91	0	0	0	1	1	0	1
92	0	1	0	1	1	1	1
93	0	2	0	1	2	1	1
94	0	1	0	1	1	1	0
95	0	1	0	0	1	1	1
96	0	1	0	0	1	1	0
97	0	1	0	1	1	0	1
98	1	2	0	1	2	0	0
99	0	0	0	1	1	0	0
100	0	0	0	1	1	1	1
101	0	0	0	1	1	1	0
102	0	0	0	0	1	1	1
103	0	0	1	0	2	1	1
104	0	0	0	0	2	1	0
105	0	0	0	0	2	0	0
106	0	0	1	0	2	0	0
107	0	0	0	0	2	0	1
108	0	0	1	0	2	0	0
109	1	0	1	1	1	1	1
110	1	0	0	1	2	1	1
111	0	0	0	1	2	0	0
112	0	0	0	0	2	0	1
113	0	0	0	0	2	1	1
114	0	0	0	0	1	1	1
115	0	0	0	0	2	1	1
116	0	2	0	0	2	1	1
117	0	2	0	1	2	1	1
